# Supplementary material for: Observation and modelling of snow at a polygonal tundra permafrost site: spatial variability and thermal implications
Source: Copernicus journal article supplement (doi:10.5194/tc-2017-280), 2018-01-02
Supplement: Supplementary file [file tc-2017-280-AC1-supplement.pdf]

# Response to Comments by Anonymous Reviewers #1 and #2

We sincerely thank the two anonymous reviewers for their constructive comments, and henceforth their substantial contribution to the improvement of the manuscript.

In this Response, Reviewers' comments are in blue, response to them is in black, modifications to the manuscript are highlighted in yellow. A corrected version of the manuscript, including Figures, is provided after the Response (from p. 18 on).

## Response to Reviewer #1

---

### General comments

10 **1. The study explores the spatial variability of snow properties at the polygonal tundra site at Samoylov site, Russia. Researchers use 1D snow and heat flow models to study spatial impact of snow on polygonal tundra, which somewhat limits the full understanding of the corresponding changes.**

We thank the reviewer for pointing out this important limitation, which we only partially mentioned and addressed in Sect. 7.4.

15 To day, only few 3-D thermo-hydrological models have been deployed over polygonal tundra landscapes. We are especially aware of recent work by Kumar et al. (2016), with the PFLOTRAN model deployed over 4 different polygonal tundra sites. At these sites, a considerable amount of field data were collected, which is currently unequalled elsewhere in the Arctic : meteorological data (including air temperature, summer precipitation, snow depth, relative humidity, wind speed and radiation), soil temperature data (at 16 different depths for 9 points across 4 transects, one at each site), and detailed  
20 subsurface characterization through 30 cm deep soil cores at each site and micro-topographic condition. Despite this tremendous amount of data, the authors «*believe that insufficient characterization and parameterization of heterogeneous properties [of the soil] due to limited data availability is one of the key reasons for [the warm model] bias.*» and further invoke «*poorly bounded [thermal] boundary conditions at the bottom of the modeling domain*».

25 This means that the state-of-the art observations and models still fail to fully address the problem of spatial variability in soil temperatures 3-dimensionally.

Knowing these limitations, we addressed the question of the thermal impact of spatial variability in snow conditions from a 1-D perspective, which has 2 main limitations : (i) we omit the lateral heat conduction flux and (ii) we disregard the spatial variability in soil thermal properties and water content.

30 Despite these limitations, we believe our study has value, as it provides a needed complement to present-time studies like the one by Kumar et al. (2016), who focused only on soil processes. For a comprehensive (future) 3D model it is necessary that all factors contributing to spatial variability in soil temperatures, most notably snow, are well characterized and we regard our study as an important step in this direction.

Following the Reviewer's suggestion, we made the limitations of using a 1-dimensional model in Sect. 7.4 more explicit:

« Our approach disregards the spatial variability in soil properties and soil saturation, which is also related to micro-topography, as well as the lateral heat fluxes between different landscape units. Distributed, 3-dimensional simulations that include the effect of snow redistribution by wind and spatial variations in soil conditions could, in theory, support a more consistent assessment of spatial variability in soil temperatures. However, they require a considerable amount of in situ data that is currently unavailable even at the most instrumented sites (Kumar et al., 2016). »

**2. The current version of the paper lacks of discussion of the previous work that includes the effect of wind and vegetation (see SnowModel by Liston and Elder [2006]). It is important to include the description on how the SnowModel is different/similar from the current model development.**

We thank the reviewer for pointing out the missing reference to the work of Liston and Elder (2006). Our approach in the treatment of wind effect on vegetation follows the work of Liston and Elder (2006) by considering no accumulation of high-density, wind-blown snow as long as snow depth has not exceeded the snow-holding capacity of the basal vegetation. This generates a lower density of the snowpack in a « vegetation layer », which actually corresponds to the snow-holding capacity defined by Liston and Elder (2006).

We clarified the relationship of our work to the work by Liston and Elder (2006) by stressing both the heritage and differences to this work in the manuscript :

**L2 p11 :** « The underlying hypotheses are that i) while snow hasn't filled the snow-holding capacity of the basal vegetation, snow is not available for transport (Liston and Elder, 2006) and therefore snow accumulation in the grass-layer consists in precipitation particles of lower density than typical wind-blown rounded grains; and ii) that grasses form a rigid structure that protects snow from wind compaction. »

**L7 p 11 :** « Note that our approach however differs from the SnowModel by Liston and Elder (2006) in the sense that we focus on snow microstructure and properties (density,  $K_{th}$ ) as influenced by the wind conditions, while the SnowModel and its blowing snow sublimation and redistribution scheme SnowTran3D target the spatial distribution and time evolution snow-water-equivalent, and the way they are affected by vegetation. »

25

**3. I was not sure what is the purpose of doing WIND, WIND+VEG, WIND+VEG+ANISO, since all three looks similar to me (Figure 3). Wind is the dominant factor in tundra, why should we care about other cases? For example, if you calculate the total difference between calculated and observed ground temperatures, I bet you would not see much improvement between those three cases. The changes in the snow over first part of the winter (dark winter) can be done by increasing snow density (i.e. chose the right empirical formula and adjust snow densities).**

We assume that the Reviewer is referring to Figure 7 in this comments, as Figure 1 to 6 of the original manuscript do not deal with WIND, WIND+VEG and WIND+VEG+ANISO simulations. In Figure 9 and 10, we indeed inter-compared the **simulated soil temperatures** in the WIND, WIND+VEG and WIND+VEG+ANISO setups, and compared them to observations. Figure 10 (which shows an improved setup with respect to Figure 9, see original manuscript) shows equal performances over winter phases 1 to 3 for WIND and WIND+VEG, while WIND+VEG+ANISO performs better.

35

However, soil temperature is not the only benchmark variable that we considered, as a proper modelling of the snow stratigraphy is essential for other important applications of SNOWPACK-like models. To improve the consistency of the paper and justify our effort to simulate a reasonable snowpack structure, we added the following lines to the Introduction :

5 « A reliable simulation of snow structure in SNOWPACK-like models is essential not only for the simulation of the ground thermal regime but also for a variety of applications ranging from the exploitation of remote-sensing data (e.g. Montpetit et al., 2013), to the assessment of snowpack structure impact on wildlife (e.g. Ouellet et al., 2017). »

Following this philosophy, Figures 7 and 8 clearly reveal that the WIND option alone is not enough to capture snow vertical structure in terms of stratigraphy, density and  $K_{eff-z}$  profile : whichever empirical « wind-density » formulation you adjust, if it takes only wind into account, it will fail to reproduce the vertical structure of these variables. Oppositely, the WIND+VEG 10 setups perform better in this respect, while not degrading the bulk values of these variables.

In conclusion, wind is surely the dominant factor shaping the snowpack in tundra environments, but basal vegetation (here the high sedges) introduces a second-order modulation by i) affecting the surface roughness at the soil-atmosphere interface (snow-retention effect of grasses) and ii) affecting the snow compaction and snow metamorphic processes. It is important that snow models deployed in the Arctic for a variety of applications are able to account for these processes.

15

**4. To me the most interesting part would be matching temperatures toward the end of snow season (snowmelt). How should it be done, what kind of parametrization can improve the Figure 10, May jump in the temperatures.**

We completely agree with the high interest of studying melt-time soil temperature and associated processes. However, these were clearly not the target of our study, which focuses on dry snow properties and their thermal impact, as outlined by the 20 INTERACT SSTIS project that provided our funding. Therefore, our modelling strategy did not target the melt period, and our model design is not appropriate to study the associated processes.

**5. Overall, there is a lack of the discussion on what scientific knowledge does it add to the current state of knowledge on snow.**

25 We believe that our contributions to the state of the knowledge on Arctic snow are thoroughly summarized in the Conclusion of our manuscript as follows :

- 1. An analysis of the drivers of the spatial variability in snow insulating power across a polygonal tundra landscape, and an assessment of the thermal impact of this variability
- 2. First CT estimates of DH and wind-slab conductivities in an Arctic tundra snowpack (validated against the 30 ground thermal regime through numerical simulations)
- 3. An inter-comparison between 3 recent parameterizations for  $K_{eff-z}$  with different philosophies (see later in the Response to specific comments)
- 4. The successful use of a density and anisotropy-based parameterization of  $K_{eff-z}$  in a detailed snow model (as envisioned by Löwe et al., 2013)
- 5. The highlight of the early and polar night winter periods as the most sensitive to the thermal properties of 35 snow, helping prioritize the future snow investigations through field work or modelling

These points are respectively discussed in Sections 3.2, 7.1, 3.3, 5.1 and 7.1, 7.3.

If we missed to raise other relevant points, we would appreciate if the reviewer could more specifically pinpoint what is missing.

5 **6. The flow in the manuscript require further improvement / Current version of manuscript requires flow improvement and more clarity.**

We worked on several aspects to improve the flow and clarity of the manuscript :

- First, the objectives and description of the paper's approach was refined at the end of the Introduction, following joint advice from Reviewer #2 :

10 « *Our objectives in this study were (1) to investigate the thermal properties of snow in an Arctic snowpack and their link to microstructure and microtopography, (2) propose adaptations to a detailed snow model to these local snow conditions, to be validated against snow and soil temperature observations and (3) quantify the thermal impact of spatial variability in snow depth and snow structure across a typical polygonal tundra microtopography. To this end we relied on snow samples analysed by CT, on a variety of in situ snow observations collected during a dedicated field program at Samoylov in April*

15 *2013, and on more long-term observations on meteorology and soil variables. The model adaptations we propose were made to the detailed snow model SNOWPACK, which we used in combination with the CryoGrid3 (CG3, Westermann et al., 2016) permafrost-soil model for the simulation of the ground thermal regime, as this model was extensively validated at Samoylov.* »

- Second, section 3 and section 6 were completely revised, including condensation of the text, paragraph merging and structural changes. Typically, the focus of Section 3 was tightened around the thermal properties of the snowpack. This is reflected by changes in the titles and subtitles, in the organisation of the paragraphs and in the shortening of the section. Section 6 was mostly re-written and simplified. We do not exhibit here all the changes made, and refer to the manuscript with corrections highlighted for an overview of the modifications.
  - Finally, effort was made to better synthesize relevant informations in the Figures, leading to one Figure less in the revised manuscript.
- 20
- 25

**7. Snow modeling literature review has to be complemented with the work by Liston and Elder (2006).**

Done – see response to 2.

30 **8. How these results can be extrapolated locally/globally?**

More field data originating from other tundra environment would definitely be ideal to further validate and generalize parts of our findings. This is typically the case for the characterization of the spatial variability of the snow thermal properties, and for the evaluation of the modified SNOWPACK simulations on soil temperature observations. These data would ideally feature co-located soil and surface temperature observations, and snow-depth sensors, at places with intensive

35 characterization of the soil (many replication of measurements within each micro-topographical class) to exclude or limit error compensations originating from soil thermal modelling.

However, some of our findings have a more general value, as the highlight of the early and polar night winter periods as the most sensitive to the thermal properties of snow, or the inter-comparison of the 3 parameterization for  $K_{eff-z}$ .

We complemented our manuscript so as to specify the local vs general flavour of our conclusions:

- Sect 7.1 : « *On the one hand, our adaptations to SNOWPACK are inherently local, tied to the specific Samoylov conditions, and should be verified at other tundra sites comprising co-located snow and soil observations together with a complete set of meteorological driving data.* »
- We recall a sentence from the Conclusion : « *We also estimated the impact of the natural snowpack spatial variability on the underlying permafrost thermal regime during an entire winter, based on our  $K_{eff-z}$  and density observations and on our understanding of the snowpack dynamics. Beyond this quantitative estimate, which is intrinsically tied to the local climatology and micro-topography of our site, an important conclusion is that the sensitivity of the ground thermal regime to the overlying snow reaches a maximum during the cooling winter period, when temperature gradients between atmosphere and soil are at their steepest.* »

## 9. What improvements the CLM modeling community have to do in order to improve snow representation in the current CLM type models? Please check and add that to the literature review.

We answer here regarding the possibilities of improvement of the snow schemes of GCMs and ESM in tundra environment only (excluding shrub tundra and taiga). From our study, we judge that significant improvements would proceed from (i) taking wind compaction into account, (ii) representing a basal DH layer (of lower density / conductivity), and (iii) carefully considering the extinction of solar radiation within very dense snowpacks. To our knowledge, this is not yet the case in most snow schemes (e.g. Wang et al., 2013). Furthermore, these snow schemes should be validated at places with co-located observations of snow (depth, SWE), meteorological variables and soil temperatures, that help verify that the mass balance, density and thermal role of the snowpack are captured properly. This latter point is raised in Sect 7.4 of the original manuscript. To enrich our manuscript with the former elements, we complemented the Conclusion section:

« *Finally, our study pinpointed processes that exert an important control on the ground thermal regime of tundra regions while being neglected in the snow schemes of general circulation models or earth system models (e.g. Wang et al., 2013): the effect of wind compaction and DH growth on the insulating power of tundra snow, as well as the enhanced extinction of solar radiations in by dense wind-crusts within the snowpack. This suggests possible ways to improve snow modelling over Arctic regions in these models, of benefit for the representation of permafrost -processes.* »

### Abstract

#### P1. L20. Introduce the definition of the snow anisotropy.

We here refer to the structural anisotropy of the three-dimensional microstructure, or loosely, the anisotropy of « Snow grains and arrangements thereof », meaning that they do not have the same properties in all directions. We added « *microstructural* » to the abstract to point this out. The definition of anisotropy with regard to  $K_{eff-z}$  is given in the Introduction at the first occurrence of this term.

#### P1. L23. Similarly, ‘depth hoar’ has to be defined.

Depth hoar is one of the 9 main grain shapes identified by the International Classification for seasonal Snow on the Ground (Fierz et al., 2009) and very common to snow observers. We do not feel it is necessary to explicitly repeat the definition from the classification.

5 **P1. L24-25. “The potential of an ...”, this sentence is not clear to me.**

We changed this sentence in the abstract, which should now be clearer :

« *Also, a density and anisotropy-based parameterization for  $K_{eff-z}$  lead to further slight improvements* »

**P1. L25. “Dark part of winter” has to be defined.**

10 We changed this sentence in the abstract :

« *Soil temperatures were found to be particularly sensitive to snow conditions during the **early winter and polar night**, highlighting the need for improved snow characterization and modelling over this period.* »

**P1. L25-26. Is that local to the Samoylov only?**

15 It is likely the case in most of the Arctic land surface area experiencing low Snow accumulation (<50 cm), as this sensitivity is driven by the high value of the temperature gradient between the (warm) soil and (cold) air, which is at its highest during this period and particularly strong where the snowpack is shallow. The general value of this statement is stressed in the Conclusion (see point 8 above).

**P1. L27. It is common to reference Brown et al., (1997) about 24% of the land in Northern Hemisphere occupied by permafrost. Instead I suggest to say significant portion of land in**

20 **Northern Hemisphere since permafrost is dynamic and shrinking spatially.**

We thank the reviewer for this correction, and added the reference in the manuscript. However, we decided to propose a rough approximation of the exact estimate from the cited publication (23.9 %), for permafrost is not the focus of our paper and this approximation is just meant to propose an order of magnitude to the reader. In this respect, the approximation we propose is - to our knowledge - still valid : mean global temperature change between 1998 and now is around 0.2 °C, and permafrost sensitivity to global warming has been assessed to  $4 \pm 1 \cdot 10^6 \text{ km}^2 \text{ C}^\circ^{-1}$  (Chadburn et al., 2017), hence a change of less than 25 1% of permafrost extent is to be expected between 1998 and now.

**P2. L7. I would say, that soil temperatures beneath the thick snowpack would usually be warmer  
.... What is the difference between snowpack and seasonal snow?**

30 *Snow* is the material / medium, while *snowpack* refers to the snow covering a land surface. Snow can be grown/analysed in laboratory, where it does not form a snowpack anymore.

In the present study, « snowpack » and « Snow » can be interchanged most of the time, because we study in situ snow, within a snowpack. Both are seasonal, because the snow cover at Samoylov does not last all year long. Elsewhere like in Antarctica or in glaciers' accumulation zone, snow or snowpack could be perennial.

**P2.L9. Why to study snow in tundra is important? To me, in tundra vegetation should not play much role, I would say that the wind will play the most dominant effect on snow. Why would even consider the effect of vegetation?**

See response to point 3 above.

5  
**-. L17. 'HS' change to hs, otherwise it is associated with word abbreviation.**

HS is the official abbreviation for Height of Snowpack / Snow depth in the International Classification for seasonal Snow on the Ground (Fierz et al., 2009). Following your concern, we were careful to use only the official terms when designing this variable, changing one occurrence of « snow height » to « snow depth » in the manuscript.

10  
**This paragraph has a lot of abbreviations (CT, HFP and so on). I suggest to make a table that reader can quickly refers to when forgets the abbreviation. The table can include short description of the method and a reference.**

We generally agree about curse and blessing of acronyms. We think though that the amount of acronyms in the present manuscript is still average and prefer to keep tables for actual findings from our study.

15  
**P3. Model literature review paragraph does not include work by Liston and Elder (2006), which includes wind and vegetation. What lessons can be learned from that model?**

See response to point 2 above.

20  
**P3.L27. 1m high rims. Is that true?**

The height of the rims was indeed over-estimated in this statement.

We corrected the manuscript based on 3D laser-scanning performed in 2017 :

« [...] rims that are 20 to 50 cm high ».

25  
**P5.L26 Add the equation used for the heat conductivity.**

The calculation of the effective thermal conductivity is based on the solution of the stationary (pore scale) heat equation which is solved directly on the binary CT image. This is now explicitly stated in Sect. 2.2.2.

30  
**P5.L29. Changes “figures” to “values”. Does that mean that for other temperatures (not -10 oC) the values will change? Do you know what is the possible range?**

Done. Air conductivity diminishes and ice conductivity increases when temperature decreases. Typical values (in  $\text{W m}^{-1} \text{K}^{-1}$ ) are given in the following Table from engineering toolbox.com :

|              | 0°C   | -10°C | -20°C | -30°C |
|--------------|-------|-------|-------|-------|
| <b>ki</b>    | 2.22  | 2.30  | 2.39  | 2.50  |
| <b>ka</b>    | 0.024 | 0.024 | 0.023 | 0.022 |
| <b>ki/ka</b> | 92.5  | 95.8  | 103.9 | 113.6 |

The effective thermal conductivity of snow inherits the temperature dependence from both, ice and air conductivity in a non-linear way. This effect of temperature could be estimated from the parametrization given in Löwe et al. (2013) which incorporates it via the explicit dependence of the parametrization on the phase conductivities. For an order of magnitude, the respective values for 0°C and -30°C given above can be used : we obtain a relative difference of 7 % for an isotropic microstructure with ice volume fraction of 0.3. The (ki, ka) values used for the analysis in the paper lie in the middle of that range, leading to an uncertainty of less than 4 %.

We amended the manuscript to include this estimation :

10 *P5 L28 : « These values approximate the conductivity of the air and ice medium at temperatures between -15 °C and -20 °C (cf. engineering toolbox.com and data compiled by Waite et al., 2006), causing a maximum error in retrieved  $K_{eff}$  of less than 4 % for a snowpack between 0°C and -40°C (estimation based on the parametrization from Löwe et al 2013 using the respective values of ka and ki). »*

15 **Figure 3A. Differentiating snow layers by colors are confusing, since several colors looks the same to me. Consider no colors, just boundaries to separate layers and add notations inside each layer (RG, FC and so on), can also increase the resolution to fit the notation.**

We changed the plot and preferentially used symbols to represent grain shapes, instead of colours.

**Figure 3B. Bulk density and  $K_{eff}$  are they step functions or piece-wise linear functions?**

20 Bulk density is one single value per profile, indicated as text over each profile's plot in Fig. 3b.

Density and  $K_{eff-z}$  profiles show one (averaged) value over each small volume or depth interval where the measurement or estimation was actually made. This depth interval depends on the instrument or estimation methods. It is typically around 2.5 cm for the CT estimates of  $K_{eff-z}$  and density shown in Fig. 3b. The snow profiles were not continuously sampled for density and  $K_{eff-z}$  with the CT method. Instead, a few (4 to 6) depths intervals of about 2.5 cm, were selected, and the CT analysis provided density and  $K_{eff-z}$  estimates averaged over these depth intervals (plain segments in Fig. 3b). For visualization purposes, a dashed line connects these plain segments in Fig. 3b, but it does not represent any measurement.

We clarify this feature in the caption of Fig. 3 :

*« Density and  $K_{eff-z}$  values are represented by piecewise constant functions over the layers where the CT analysis was performed; these segments are connected by a dashed line as a guide to the eye.*



### P9.L8. define the Rth

Done.

#### 5 **Figure 6. How anisotropy (Q) was calculated? Provide an equation.**

Providing the equation for Q would require a considerable overhead in additional, technical details from an entire section in Löwe et al. (2013), where this parameter was introduced. Reproducing these explanations in our paper, would considerably reduce its focus and introduce unnecessary complexity. We agree though that a non-technical description of Q is required in the manuscript, so we clarified the link between Q and micro-structure, and directly referred to the equation in Löwe et al.

10 (2013).

« *It relies on an anisotropy parameter, Q, calculated directly from CT images based on the two-point correlation function (Löwe et al., 2013, their Eq. 4)* »

#### 15 **Section 3.3. List equations for C2011, R2013, L2013. Why only these three formulas? How do they compare with Sturm et al., (1997) or Goodrich (1982) or others equations for conductivities? It is not clear how those empirical relationships account for Q?**

Various comparisons of different parametrizations already exist in literature. The reason to include just these three is the following :

20 Sturm et al. (1997) and C2011 rely on the exact same methodology, i.e. squared regression to density. As C2011 re-assessed the formulation from Sturm et al. (1997) based on recent data using the NP technique, it felt consistent to use C2011 as a benchmark for CT-assessed  $K_{eff-z}$ . Then, R2013 and L2013 both differ from the philosophy of Sturm et al. (1997) and C2011, by regressing against anisotropic grain types with vertical preferential direction (R2013) and by relying on theoretical bounds for  $K_{eff-z}$  (L2013). From a comparison of these three it is possible to reveal the uncertainties in effective thermal conductivity for a snowpack (that is dominated by anisotropic depth hoar) when using a generic density-parametrization 25 (C2011), or a density-parametrization that was mostly derived from anisotropic snow (R2013), or L2013 that explicitly accounts for both, density and anisotropy effects for a depth hoar dominated tundra snowpack.

#### **P12. L12-15. How Keff is calculated for each 4 cases (DEFAULT, WIND, ...)?**

We better explained this in the manuscript :

30 Sect. 4 : « *All setups except the one including the ANISO adaptation rely on the original  $K_{eff-z}$  parameterization from SNOWPACK described in Sect. 2.5.* »

**Figure 7. I assume these profiles are simulated by model. Are the grain type inputs or calculated by model? How these grain types evolve in the model?**

The grain type are simulated by the SNOWPACK model. We add this element to the description of SNOWPACK in section 2.5, where references to the snow grain evolution laws are given.

Sect. 2.5 : « Snow is represented by a number of state variables (temperature, density, and water content) and the snow micro-structure by grain characteristics (grain size, size of bonds, sphericity, and dendricity) which allow a diagnostic of the

5 grain type (Lehning et al., 2002b). »

**Figure8. Make c and d plots. Separate rim from grass. Is that possible to plot snow observed texture next to the profiles?**

This concerns Fig. 7 now. We added the observed snow shape and suppressed the ice-center profile which notably differed  
10 in terms of involved processes.

**P13. L23-26. Phases1-4 show them on the Figure 9.**

Done, also on the Fig. 10 and 11 of the original manuscript.

15 **Section 6. Think about how you can revise that section. There is too much information in it, which is hard to follow.**

See response to point 6.

**Figure 11. The colors on the plot is hard to see (especially magenta).**

20 Magenta color was changed to lightblue, improving the plot's readability.

**P18. L30. P19.L24. It will be interesting to discuss how new version CROCUS might change the result of current modeling. It looks to me that the conductive heat transport within the snowpack during snowmelt is complemented by an adjective heat transport that the melted snow water carries with it in the snowpack. Typically, the temperature  
25 gradient changes in sign or fluctuates near 0 C (making thermal conductivity useless during snowmelt). It will be nice to discuss what could be an easy (straight forward) way to parametrize the adjective heat transfer introduced by flowing water in the snowpack.**

We interpret that the Reviewer means « advected heat transport ».

The very interesting question raised by the Reviewer's comment is however out of the scope of our manuscript, as explained  
30 in point 4.

---

Specific comments:

5 Last paragraph of introduction: the paragraph simply describes the various section of the paper. Typically, such paragraph can be found in theses, but I think it is not relevant here. I would remove this paragraph, which would reduce the introduction (already quite long).

Done.

Figure-1 should include coordinates.

10 Done.

The use of NIR to calculate the ratio of DH with respect to snow depth should be more detailed. Photos are simply showed with explanation on the method used to distinguish DH. Was the calculation made automatically, or was a threshold applied on reflectance?

15 Following the reviewer's advice we now provide more details as to the treatment of the NIR images in the Methods section :  
**Sect 2.2.1:** *Near-infrared (NIR) images of the trench were realized to characterize the thickness of the basal depth hoar (DH) layer along this transect at 50 cm spatial steps. The NIR-images were treated in ImageJ (Schneider et al., 2012) by the following procedure: the green channel was extracted from the RGB-image. The brightness and contrast was visually optimised based on the histogram. The average brightness of the full profile was 125, the depth hoar region 106, the surface layer 125 (brightness range 0-255). The boundary between these two main layers was measured based on a ruler put in the center of the image. The resolution of the NIR images was better than 0.1 mm, so depth hoar crystals and especially depth hoar chains were in addition easy to discriminate from the upper layer with smaller, mostly rounded grains.*

20

**Section 2.2.1:** More details is needed regarding the spatial representativity of the SR50 measurements. Authors mention that small differences can be due to local scale variability, but a quantification should be done. Typically, the spatial variability is caught within 30-35m (1m spacing) in open tundra environments.

25

What was the variability around the site? How does the average depths around the site compare to the SR50 measurements? This should be clarified, especially since SNOWPACK is forced on observed depths by the SR50 (section 2.4).

30 The SR50 is placed 1.23 m above snow-free ground with a beam angle of approximately 22°. The SR50 measure is therefore representative of a circle of radius (surface) ranging from 0.23 m (0.17m<sup>2</sup>) in snow-free conditions, to 0.19 m (0.12 m<sup>2</sup>) with 20 cm of snow.

Spatial variability of the snowpack was indeed not investigated in our manuscript at such small, decimeter scale. However, we can rely on two sources to assess that this small-scale spatial variability in snow depth can be large. First, snow depth and

DH height were recorded at 0.2 m steps along a grass-polygon transect nearby the Samoylov station (Fig. R1). Although the delimitation of slope, rim and center is approximate and observer-dependant, these data illustrate that snow depth variations can reach 10 cm over 20 cm distance at Samoylov, which is half the footprint of the SR50.

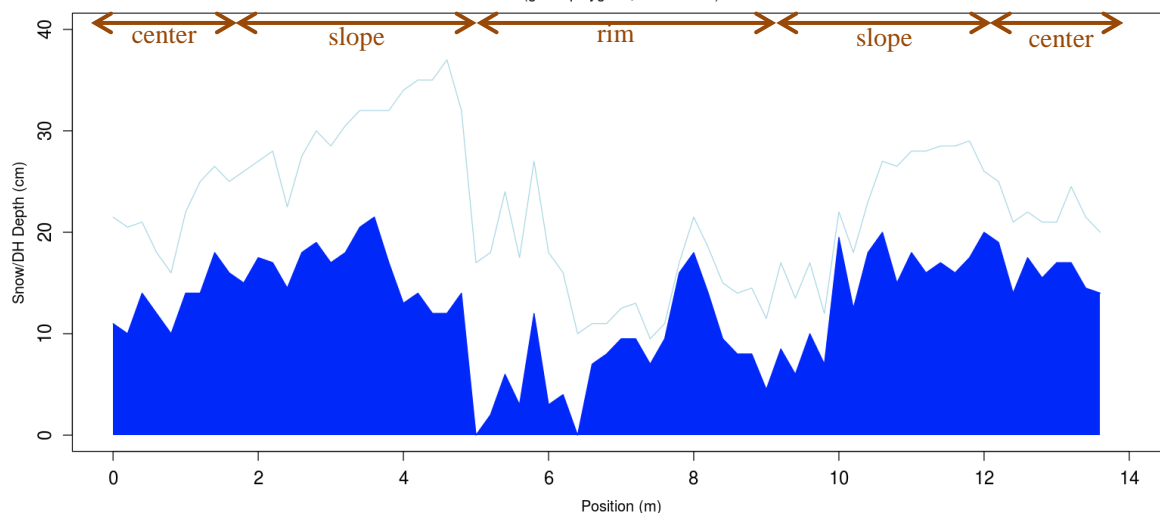

5 **Figure R1: Snow (lightblue) and DH height (dark blue) along a 13.6 m transect in a grass-polygon in the vicinity of the Samoylov main station, on 19-04-2013. An estimation of the local micro-topography is also given.**

Second, spatial variability of snow depth at the decimeter scale in link to (vegetation-induced) micro-relief was investigated by earlier publications, and we especially recall transect data from Sturm and Holgren (1994) showing spatial variations even higher than recorded at Samoylov over the sedge tussocks tundra landscape at Imnavait Creek, Alaska (Fig. R2, extracted

10 from Sturm and Holgren (1994)).

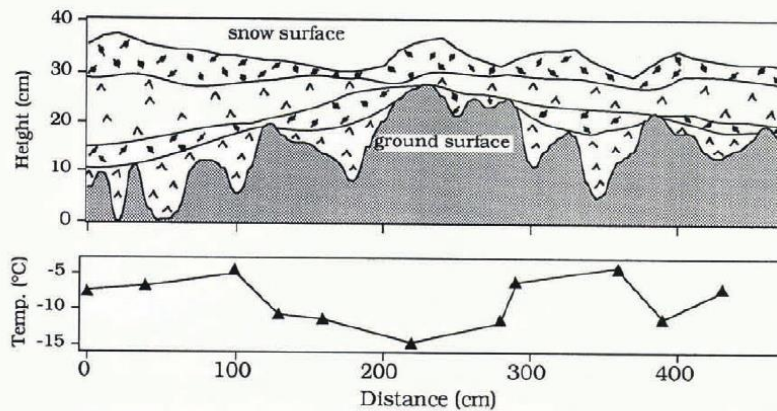

Fig. 2. A cross section through the snow cover at Imnavait Creek, 18 November 1989. Depth hoar is indicated by an inverted “V”; wind slab is indicated by a dot with a line through it. Note discontinuous snow strata that pinch out over tussock tops. In the lower part of the figure, the temperature of the snow-ground interface is shown.

**Figure R2. Extract from Sturm and Holgren, 1994.**

For our SNOWPACK simulations we made use of SR50 data, rescaled so that their value in late April 2013 (13 cm) matched the mean of observed Snow depth at 20 polygon centers sites at this date (20 cm). This difference of 7 cm between SR50 Snow depth and the mean of observed snow depths at the manual snowpits from center locations, can well be explained by the small, decimeter scale variability in snow depth, as illustrated above.

We thank the reviewer for pointing out this missing quantification, and amended the manuscript subsequently :

P5 L12 : Snow depth was recorded continuously over the 2012-2013 snow season by an SR50 sensor (Campbell Scientific,  $\pm 1$  cm accuracy,  $\pm 1$  cm precision) located in the topographically low center of the reference polygon (Fig. 1). This instrument acquires data over a circular surface of  $\sim 20$  cm radius. However, this snow depth record differed from data acquired at grass-center snowpits: on 21 April 2013 the SR50 measured 13 cm of snow while both the transect, CT and snowpit data indicated depths in excess of 17 cm for grass-center conditions (Fig. 3). This difference is likely due to small scale variability in snow depth induced by micro-relief (notably vegetation tussocks) and in processes such as wind erosion immediately below the SR50 sensor: ancillary snow depth data acquired over a 14 m grass polygon transect at 20 cm spatial resolution show a 7 cm variance in snow depth, and variations up to 9 cm over 40 cm horizontal distance in center conditions. To build a representative snow depth record for grass-center conditions, we matched the SR50 snow data to the median of manually recorded snow depths at grass-center snowpits (20 cm) on 21 April 2013, by multiplying the SR50 record by a constant factor of 1.6. The 7 cm offset in late April is consistent given the observed small-scale variability in snow depth. Finally, a time-lapse camera provided daily, low-resolution images of the reference polygon.

Section 2.4: the authors are well aware of the sensitivity of SNOWPACK to uncertainties in meteorological forcing data. Many products exist, the authors should justify why using ERA-interim rather than other meteorological

products... Also, it is mentioned that a comparison with in-situ meteorological stations showed that ERA is 'suitable'...this should be clarified.

**Section 7.4.: there needs to be a discussion on meteorological forcing uncertainties... The resolution of ERA is quite large compared to a single site.**

- 5 The only ERAi data used in our study were wind-speed, radiation, plus air temperatures over a 6-week period in February-March. Here we rely on the following elements to justify the use of this atmospheric product for our application :
- 10 i) Temperature, radiation and wind fields are rather homogeneous over large spatial scales in this Northern Siberian region in the absence of marked relief perturbing the synoptic western atmospheric flow (Brun et al., 2013).
  - 15 ii) Following, the local values of these atmospheric variables at Samoylov should not depart much from the reanalyzed field over larger (80 km for ERAi) scales
  - iii) An exception of (ii) occurs for air temperature where oceans/seas cover a significant part of the reanalysis grid-cell. However, the Samoylov Island in the Lena delta is far enough from the Laptev sea coast, for the entire ERA-i grid-cell containing Samoylov to be considered as an inland pixel in the reanalysis.
  - 20 iv) A comparison between air temperature observed at Samoylov and the reanalysis field for the 2012-2013 snow season (excepting 1-02-2013 to 15-03-2013 when Samoylov sensor saturated), confirms the extreme good quality of the ERA-i product for air temperatures (Fig R3).
  - v) ERA-i was shown by previous literature to be an adequate forcing for Snow simulations in North-Eastern Europe including Siberia (Brun et al., 2013).
  - vi) Finally, precipitation is often the atmospheric variable the most mis-represented in reanalyses fields (Troy et al., 2011), but first, ERA-i only only minorly suffers from this issue for winter precipitation (Troy et al., 2011 ; Brun et al. 2013) and second, we circumvent this possible issue by forcing the SNOWPACK model with observed Snow depths.

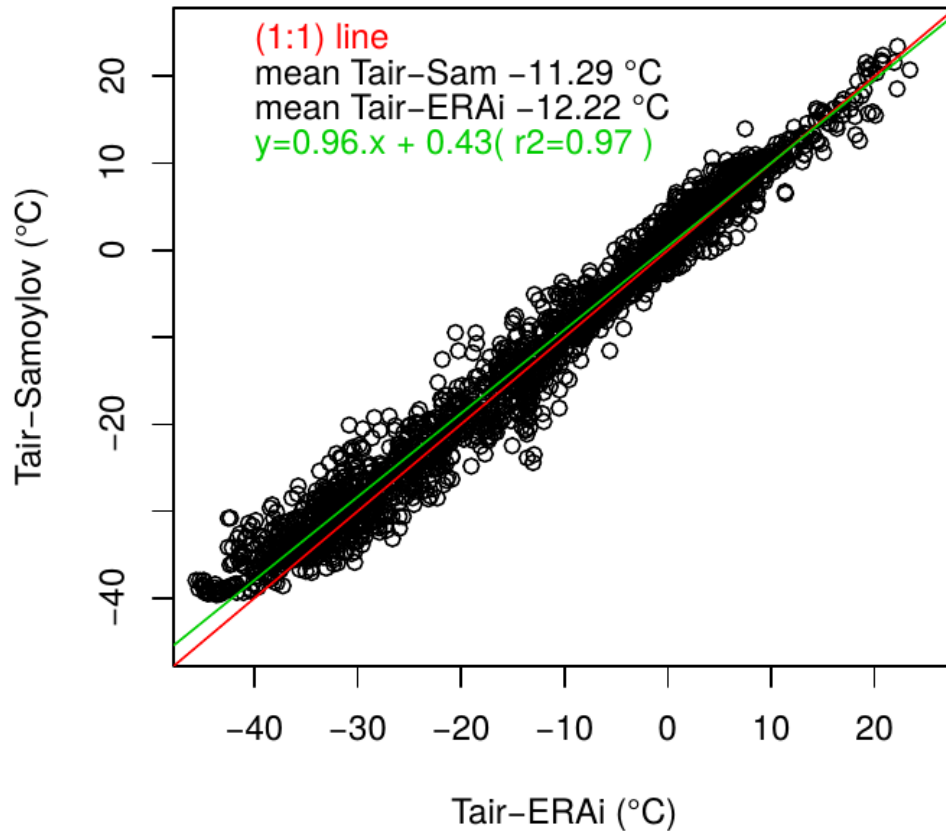

**Figure R3:** Comparison between ERA-i 2m air temperature (x axis) and 2m air temperature measured at the Samoylov station (y axis) over 2012-2013 (excluding the 1-02-2013 to 15-03-2013 period). Green line is the linear regression between these values.

Following the Reviewer's advice we modified the manuscript as follows :

- 5 **Sect 2.4:** Unfortunately the sensor (HMP45, Campbell Scientific) became saturated at temperatures below -40 °C and so for the period between 1 February and 15 March 2013, when the air temperatures were below -40 °C, we used air temperature records from the ERA-interim reanalysis (ERA-i; Dee et al., 2011) instead: for the rest of the 2012-2013 winter period, ERA-I temperatures show a high correlation with Samoylov observations ( $r^2=0.97$ ) and a low bias (-0.9°C). The incoming shortwave and longwave radiation and the wind-speed were also taken from ERA-i as none of these variables was recorded
- 10 at Samoylov during the 2012-2013 snow season. ERA-I fields were proven to be a high quality source of driving variables to simulate the evolution of the Northern Eurasian snowpack including Siberia (Brun et al., 2013), with minor differences between station data and grid-field over large, rather flat areas like the Lena Delta. A comparison of ERA-i with locally acquired meteorological data from earlier years at Samoylov furthermore confirmed this validity for the skin surface temperature, which responds very sensitively to differences in the driving variables (Langer et al., 2013).
- 15 **Sect. 7.4:** This uncertainty, together with uncertainty in the meteorological forcing that cannot be completely excluded, also affects our estimates of the thermal impact of snow spatial variability. Continuous monitoring of ice depletion at the base of

the snowpack, and snow monitoring programs focusing on the early and dark winter periods **at sites comprising both meteorological and radiation observations**, would help to provide better constraints for the thermal characteristics of the snowpack and the underlying metamorphic processes at this time, yielding substantial benefits for the next generation of coupled snow-soil models.

- 5 **Page 10, last sentence. Can you please clarify that you adjusted only the VEG...and not VAP...so that VEG would account for VAP+VEG processes?**

Indeed. We amended the manuscript for more clarity :

« We therefore chose to address both VAP and VEG together: **both effects are comprised in the phenomenological “VEG” adaptation, described below.** »

10

**On the pdf, the figures are general poor quality-resolution such as would be a simple printscreen. Please ensure high resolution on final version as some axis are hard to read.**

Figures were carefully checked and modified, taking into account recommendations from Reviewer #1. Fig. 7 from the original manuscript, now Fig. 6, was notably improved.

15

---

## References

- Brun, E., Vionnet, V., Boone, A., Decharme, B., Peings, Y., Valette, R., Karbou, F. and Morin, S.: Simulation of northern eurasian local snow depth, mass, and density using a detailed snowpack model and meteorological reanalyses. *Journal of Hydrometeorology*, 14(1), 203-219, 2013.
- 20 Chadburn, S. E., Burke, E. J., Cox, P. M., Friedlingstein, P., Hugelius, G., & Westermann, S. : An observation-based constraint on permafrost loss as a function of global warming. *Nature Climate Change*, 7(5), 340, 2017.
- Johansen, O.: Thermal conductivity of soils (No. CRREL-TL-637). Cold Regions Research and Engineering Lab Hanover NH, 1977.
- Montpetit, B., Royer, A., Roy, A., Langlois, A. and Derksen, C.: Snow microwave emission modeling of ice lenses within a snowpack using the microwave emission model for layered snowpacks. *IEEE Transactions on Geoscience and Remote Sensing*, 51(9), 4705-4717, 2013.
- 25 Ouellet, F., Langlois, A., Blukacz-Richards, E. A., Johnson, C. A., Royer, A., Neave, E. and Larter, N. C.: Spatialization of the SNOWPACK snow model for the Canadian Arctic to assess Peary caribou winter grazing conditions. *Physical Geography*, 38(2), 143-158, 2017.
- 30 Schneider, C. A., Rasband, W. S., and Eliceiri, K. W.: NIH Image to ImageJ: 25 years of image analysis, *Nature methods*, 9(7), 671-675, 2012.
- Troy, T. J., Sheffield, J., and Wood, E. F. : Estimation of the terrestrial water budget over northern Eurasia through the use of multiple data sources. *Journal of Climate*, 24(13), 3272-3293, 2011.



Wang, T., Ottlé, C., Boone, A., Ciais, P., Brun, E., Morin, S., Krinner, G., Piao, S. and Peng, S. : Evaluation of an improved intermediate complexity snow scheme in the ORCHIDEE land surface model. *Journal of Geophysical Research: Atmospheres*, 118(12), 6064-6079, 2013.

Zhang, T.: Influence of the seasonal snow cover on the ground thermal regime: An overview, *Rev. Geophys.*, 43(4), 2005.

- 5 Zhang, T., Osterkamp, T. E., and Stamnes, K.: Influence of the depth hoar layer of the seasonal snow cover on the ground thermal regime, *Wat. Resour. Res.*, 32(7), 2075-2086, 1996.

# Observation and modelling of snow at a polygonal tundra permafrost site: spatial variability and thermal implications

Isabelle Gouttevin<sup>1,2</sup>, Moritz Langer<sup>3,4</sup>, Henning Löwe<sup>5</sup>, Julia Boike<sup>3,4</sup>, Martin Proksch<sup>5</sup>, and Martin Schneebeli<sup>5</sup>

- 5 <sup>1</sup>Irstea, UR HHLy, centre de Lyon-Villeurbanne, 5 rue de la Doua, BP 32108, 69616 Villeurbanne Cedex, France.  
<sup>2</sup>Université Grenoble Alpes, Irstea, UR ETGR, Centre de Grenoble, 2 rue de la Papeterie-BP 76, 38402 St-Martin-d'Hères, France.  
<sup>3</sup>Alfred Wegener Institute, Helmholtz Center for Polar and Marine Research (AWI), Telegrafenberg A6, 14473 Potsdam, Germany.  
10 <sup>4</sup>Department of Geography, Humboldt-Universität zu Berlin, Rudower Chaussee 16, 12489 Berlin.  
<sup>5</sup>WSL Institute for Snow and Avalanche Research SLF, Fluelenstr. 11, 7260 Davos Dorf, Switzerland.

*Correspondence to:* Isabelle Gouttevin (isabelle.gouttevin@gmail.com)

**Abstract.** The shortage of information on snow properties in high latitudes places a major limitation on permafrost and more generally climate modelling. A dedicated field program was therefore carried out to investigate snow properties and their spatial variability at a polygonal tundra permafrost site. Notably, snow samples were analysed for surface-normal thermal conductivity ( $K_{eff-z}$ ) based on X-ray microtomography. Also, the detailed snow model SNOWPACK was adapted to these Arctic conditions to enable relevant simulations of the ground thermal regime. Finally, the sensitivity of soil temperatures to snow spatial variability was analysed.

Within a typical tundra snowpack composed of depth hoar overlain by wind slabs, depth hoar samples were found more conductive ( $K_{eff-z} = 0.22 \pm 0.05 \text{ W m}^{-1} \text{ K}^{-1}$ ) than in most previously published studies, which could be explained by their high density and microstructural anisotropy. Spatial variations in the thermal properties of the snowpack were well explained the micro-topography and ground surface conditions of the polygonal tundra, which control depth hoar growth and snow accumulation. Our adaptations to SNOWPACK, phenomenologically taking into account the effects of wind compaction, basal vegetation and water vapour flux, yielded realistic density and  $K_{eff-z}$  profiles that greatly improved simulations of the ground thermal regime. Also, a density and anisotropy-based parameterization for  $K_{eff-z}$  lead to further slight improvements. Soil temperatures were found to be particularly sensitive to snow conditions during the early winter and polar night, highlighting the need for improved snow characterization and modelling over this period.

## 1 Introduction

Perennially frozen ground (permafrost) is a major feature of high-latitude regions, underlying about 25 % of the northern hemisphere (Zhang et al., 1999). This essential climate variable reacts sensitively to ongoing climate change, with important implications for terrain stability, coastal erosion, surface and subsurface water fluxes, the carbon cycle, and vegetation development (e.g. Grosse et al., 2016; Shuur et al., 2015). Understanding and modelling the thermal regime of permafrost is

therefore essential for a broad variety of applications ranging from geo-engineering to landscape preservation and climatic projections, and also for ecological considerations.

The influence of snow cover on the ground thermal regime has been highlighted by a number of authors (e.g. Sturm and Holmgren, 1994; Zhang et al., 1996; Zhang, 2005; Lawrence and Slater, 2010; Gouttevin et al., 2012; Langer et al., 2013; 5 Dominé et al., 2015, 2016a, 2016b). Snow has a low thermal conductivity ( $K_{eff}$ ), ranging from 0.01 to 0.7 W m<sup>-1</sup> K<sup>-1</sup> depending on microstructure, density and wetness, and it therefore insulates the underlying ground during the cold season. The soil temperatures beneath a thick snowpack will therefore be warmer than under a thin snowpack (or no snowpack at all), given similar meteorological conditions.

Arctic tundra regions are usually characterized by thin but enduring snowpacks. At the Samoylov permafrost observatory 10 (Lena River Delta, Siberia, 72° N, 126° E), snow covers the ground for on average 7 months of the year, with the mean February snow depth ranging between 15 and 30 cm (Langer et al., 2013). Under such conditions (long duration of the snow cover and thin snowpack) the sensitivity of the ground thermal regime to the surface-normal snow thermal conductivity  $K_{eff-z}$  is particularly high (Zhang, 2005). An extensive investigation by Langer et al. (2013) into the sensitivity of the ground thermal regime at Samoylov showed that the thermal properties of the snow were the most essential parameters to constrain 15 for accurate simulation of the permafrost thermal regime.

The insulating power of snow on the underlying ground is linked to the surface-normal component of the conductivity tensor  $K_{eff-z}$  and to the height of snowpack  $HS$ . It can be expressed as the thermal resistance ( $R_{th}$ ), where  $R_{th} = HS / K_{eff-z}$ . Assessing the  $K_{eff-z}$  of a natural snowpack is not easy. It is often estimated in situ with the help of a needle-probe (NP) inserted in the snow parallel to the surface, which actually allows to estimate  $\sqrt{K_{eff-z}K_{eff-x}}$ , i.e. a combination of the surface-normal ( $K_{eff-$  20  $z$ ) and parallel ( $K_{eff-x}$ ) components of  $K_{eff}$  (Riche and Schneebeli, 2013). Since most snow types are anisotropic with regard to  $K_{eff}$  (meaning that  $K_{eff-z}$  is not equal to  $K_{eff-x}$ ; Riche and Schneebeli, 2013), a correction for anisotropy needs to be applied in order to obtain  $K_{eff-z}$  from an NP measurement. Snow samples also can be analysed for  $K_{eff-z}$  in cold laboratories, either using a guarded heat-flux plate (HFP), or by combining X-ray microtomography with direct numerical simulations at a microstructural level (CT). The differences between these three measurement techniques have been investigated by Riche 25 and Schneebeli (2013), who found that NP estimates were on average 35 % lower than CT estimates, even after correcting for anisotropy. While HFPs tended to yield higher estimates of  $K_{eff-z}$  than CT, the difference was smaller than with NP (20 % on average) and could reasonably be ascribed to identified uncertainties in the HFP and CT methods. After improving their NP  $K_{eff}$  retrieval algorithm and taking anisotropy into account, Dominé et al. (2015) reassessed the systematic residual difference between NP measurements and the CT results to about 20 %. However, an additional complication occurs when 30 an NP is used in depth hoar (a columnar snow type frequently encountered in the lower part of Arctic snowpacks): apart from being highly anisotropic, the fragile structure of depth hoar can be damaged during needle insertion, reducing the quality of the measurements. The only depth hoar sample considered in the methodological comparison by Riche and Schneebeli (2013) exhibited the largest difference (55 %) between anisotropy-corrected NP measurements and CT estimates, probably as a result of these limitations. Overall, the CT method currently seems to provide the most reliable estimates for

$K_{eff-z}$ . However, the constraints of casting and transporting samples for cold-laboratory analysis reduce its applicability for continuous monitoring and for investigations at remote sites. Almost all present-day  $K_{eff-z}$  estimates for Arctic snowpacks are therefore based on NP measurements (Barrere et al., 2017, Dominé et al., 2016b).

Statistical models for  $K_{eff}$  or  $K_{eff-z}$  (mainly as functions of density) have been developed to provide this parameter to snow and permafrost models in the absence of observational data. Such density-based regressions are inherently only able to account for parts of the variations in  $K_{eff-z}$ , as the development of some snow types (such as depth hoar) is accompanied by changes in their microstructural anisotropy that affect the  $K_{eff-z}$  even if the density remains unchanged (Löwe et al., 2013; Calonne et al., 2014). Although regressions that include the effect of anisotropy have been established (Löwe et al., 2013), they require additional input in the form of an anisotropy parameter.

Most of the current generation of detailed snow models such as CROCUS (Vionnet et al., 2012) or SNOWPACK (Bartelt and Lehning, 2002; Lehning et al., 2002a, 2002b) rely solely on density to infer  $K_{eff-z}$ . However, these models are unable to reproduce the density profiles actually observed in Arctic snowpacks (Barrere et al., 2017, Dominé et al., 2016a), which has an immediate impact on the inferred value of  $K_{eff-z}$ . A first probable cause of this failure is that these models do not represent the upward water vapour flux, that redistributes ice from the bottom of the snowpack to the upper part as a result of steep temperature gradients. Dominé et al. (2016b) have estimated that this process could lead to density changes up to  $100 \text{ kg m}^{-3}$ . Additional uncertainties occur in these models in their representation of wind-induced compaction (Groot-Zwaafink et al., 2013) and the effect of low or basal vegetation (dwarf shrubs, sedges) on snow compaction and metamorphism (Dominé et al., 2015): intertwined twigs within the snowpack can promote depth hoar formation by preserving an aerated layer, protected from wind erosion and compaction, where conductivity is weak and steep temperature gradients can establish, favouring rapid metamorphism (Hutchinson, 1965, Sturm and Benson, 1997). The warming effect of protruding twigs in early winter may also enhance snow metamorphism (Sturm and Holmgren, 1994). A reliable simulation of snow structure in SNOWPACK-like models is essential not only for the simulation of the ground thermal regime but also for a variety of applications ranging from the exploitation of remote-sensing data (e.g. Montpetit et al., 2013), to the assessment of snowpack structure impact on wildlife (e.g. Ouellet et al., 2017).

The insulating power of snow depends not only on  $K_{eff-z}$  but also on snow depth  $HS$ . Arctic and high-Arctic permafrost regions such as Samoylov commonly feature polygonal tundra landscapes, which are characterized by a distinctive micro-topography with polygons that are typically about 10 m wide and rims that are 20 to 50 cm high. This micro-topography induces considerable variations in snow depth (Wainwright et al., 2017), with significant implications for the functioning of the local ecosystem including the thermal regime, hydrology, and carbon cycle (Liljedahl et al., 2016; Hobbie et al., 2000). Thus, an integral assessment of snow thermal conductivity, snow depth and their spatial variability, is needed to fully characterize the thermal impact of snow on permafrost in polygonal tundra landscapes.

Our objectives in this study were (1) to investigate the thermal properties of snow in an Arctic snowpack and their link to microstructure and microtopography, (2) propose adaptations to a detailed snow model to these local snow conditions, to be validated against snow and soil temperature observations and (3) quantify the thermal impact of spatial variability in snow

depth and snow structure across a typical polygonal tundra microtopography. To this end we relied on snow samples analysed by CT, on a variety of in situ snow observations collected during a dedicated field program at Samoylov in April 2013, and on more long-term observations on meteorology and soil variables. The model adaptations we propose were made to the detailed snow model SNOWPACK, which we used in combination with the CryoGrid3 (CG3, Westermann et al., 2016) permafrost-soil model for the simulation of the ground thermal regime, as this model was extensively validated at Samoylov.

## 2 Data and methods

### 2.1 Samoylov site

The Samoylov permafrost observatory is located within the zone of continuous permafrost, on Samoylov Island in the Lena River Delta, Siberia (72° N, 126° E; Fig. 1). The site has been used for intensive monitoring of ground temperatures and meteorological conditions since 1998 (Boike et al., 2013). The mean annual air temperature is -12.5 °C, with mean monthly temperatures ranging from -33 °C to 8.5 °C (1998-2011). The average annual rainfall is 125 mm, while snowfall averages 40 mm yr<sup>-1</sup>. The landscape is characterized by polygonal tundra, i.e. a complex mosaic of dry polygonal ridges with wet depressed centers, and a number of larger water bodies (Muster et al., 2012; 2013).

In the present study we analysed the snow properties with respect to the micro-topography and surface conditions (water-logged, grass-covered, etc.) of the polygonal tundra. We divided the micro-topography into polygon rims, slopes, and depressed centers, referred to simply as rims, slopes, and centers. With regard to the surface conditions, the elevated rims and slopes are usually vegetated (mosses and *Dryas* species, ~ 20 cm high) while the polygon centers are typically either damp or water-logged. The damp centers are vegetated, mainly with mosses and *Carex* species (~ 15 to 20 cm high) and are referred to as “grass-centers” while the water-logged centers lie below the water table and are referred to as “ice-centers”. The ponded water in these ice-centers forms an ice base beneath the snow cover in winter and spring, which is clearly distinguishable from the moss-grass-snow interface of the ‘grass-centers’. We therefore ended up with four micro-topographic classes summarizing the typical micro-topography and surface conditions at Samoylov: grass-centers, ice-centers, rims, and slopes.

During the winter the grasses of the rims, slopes and grass-centers tend to be flattened by snow and in places become intertwined at the base of the snowpack, up to a height of 7 to 10 cm (Fig. 1 d).

### 2.2 Snow data

#### 2.2.1 In situ snow observations

The Samoylov snow campaign in April 2013 (Fig. 1) focused on sampling the four afore-mentioned micro-topographic classes in polygons located close to, but not influenced by the Samoylov station. Sixteen stratigraphic profiles were carried

out, with records of grain type, size, and occasionally density, hand hardness, and temperature measurements. Snow samples were cast with diethyl-phtalate, as detailed in Heggli et al. (2009), and were later analysed in the SLF-Davos cold laboratory by CT (Coleou et al., 2001; Schneebeli and Sokratov, 2004). Four sets of samples that covered the stratigraphy of distinct ice-center, grass-center, rim, and slope profiles, were selected for our investigations on the basis of sample integrity. The corresponding sites will be referred to as CT sites (consisting of CT rim site, CT slope site, etc..). An east-west trench was excavated across a grass-center polygon, which will be referred to as the “reference polygon” due to its denser instrumentation (Fig. 1). Near-infrared (NIR) images of the trench were realized to characterize the thickness of the basal depth hoar (DH) layer along this transect at 50 cm spatial steps. The NIR-images were treated in ImageJ (Schneider et al., 2012) by the following procedure: the green channel was extracted from the RGB-image. The brightness and contrast was visually optimised based on the histogram. The average brightness of the full profile was 125, the depth hoar region 106, the surface layer 125 (brightness range 0-255). The boundary between these two main layers was measured based on a ruler put in the center of the image. The resolution of the NIR images was better than 0.1 mm, so depth hoar crystals and especially depth hoar chains were in addition easy to discriminate from the upper layer with smaller, mostly rounded grains.

Snow depth was recorded continuously over the 2012-2013 snow season by an SR50 sensor (Campbell Scientific,  $\pm 1$  cm accuracy,  $\pm 1$  cm precision) located in the topographically low center of the reference polygon (Fig. 1). This instrument acquires data over a circular surface of  $\sim 20$  cm radius. However, this snow depth record differed from data acquired at grass-center snowpits: on 21 April 2013 the SR50 measured 13 cm of snow while both the transect, CT and snowpit data indicated depths in excess of 17 cm for grass-center conditions (Fig. 3). This difference is likely due to small scale variability in snow depth induced by micro-relief (notably vegetation tussocks) and in processes such as wind erosion immediately below the SR50 sensor: ancillary snow depth data acquired over a 14 m grass polygon transect at 20 cm spatial resolution show a 7 cm variance in snow depth, and variations up to 9 cm over 40 cm horizontal distance in center conditions. To build a representative snow depth record for grass-center conditions, we matched the SR50 snow data to the median of manually recorded snow depths at grass-center snowpits (20 cm) on 21 April 2013, by multiplying the SR50 record by a constant factor of 1.6. The 7 cm offset in late April is consistent given the observed small-scale variability in snow depth. Finally, a time-lapse camera provided daily, low-resolution images of the reference polygon.

### 2.2.2 Laboratory analysis

The samples cast in the field were transported to the cold laboratory in Davos and analysed by X-ray microtomography, thereby obtaining 3-dimensional images of the structure and bonding of the ice crystals. Binary micro-tomographic images were used as input for a finite element analysis to calculate the 3-dimensional heat conduction through the porous ice-air medium, based on the solution of the stationary (pore scale) heat equation which is solved directly on the binary CT image. The effective conductivity tensor of the analysed sample is thereafter derived. This conductivity only takes into account pure conduction through the ice-air network, ignoring the effects of water vapour flux and latent heat. For the heat conductivity calculations we used the procedure described in Löwe et al. (2013), based on NIST Finite Element programs (Garboczi,

1998), with an air conductivity ( $k_a$ ) equal to  $0.024 \text{ W m}^{-1} \text{ K}^{-1}$  and an ice conductivity ( $k_i$ ) equal to  $2.43 \text{ W m}^{-1} \text{ K}^{-1}$ . These values approximate the conductivity of the air and ice medium at temperatures between  $-15 \text{ }^\circ\text{C}$  and  $-20 \text{ }^\circ\text{C}$  (cf. engineering toolbox.com and data compiled by Waite et al., 2006), causing a maximum error in retrieved  $K_{eff}$  of less than 4 % for a snowpack between  $0^\circ\text{C}$  and  $-40^\circ\text{C}$  (estimation based on the parametrization from Löwe et al., 2013, using the respective values of  $k_a$  and  $k_i$ ).

### 2.3 Soil temperature data

Soil temperatures were recorded over the 2012-2013 snow season from three profiles within the reference polygon (rim, slope, and grass-center) at depths 5 cm, 20 cm and 40 cm, using thermistors (Temperature Probe model 107, Campbell Scientific Ltd., UK). The thermistors were calibrated at  $0 \text{ }^\circ\text{C}$  so that the absolute error was less than 0.1 K over a temperature range of  $\pm 30 \text{ }^\circ\text{C}$ .

### 2.4 Meteorological data

The SNOWPACK and CryoGrid3 models require as input the following meteorological data: 2 m air temperature, incoming shortwave and longwave radiation, wind-speed, and relative humidity of the air. We drive the models with snow depth recorded by the SR50 sensor instead of precipitation. Air temperature and relative humidity were recorded at the Samoylov meteorological station using an HMP45C air temperature and humidity sensor (Fig. 1). Unfortunately the sensor became saturated at temperatures below  $-40 \text{ }^\circ\text{C}$  and so for the period between 1 February and 15 March 2013, when the air temperatures were below  $-40 \text{ }^\circ\text{C}$ , we used air temperature records from the ERA-interim reanalysis (ERA-i; Dee et al., 2011) instead: for the rest of the 2012-2013 winter period, ERA-I temperatures show a high correlation with Samoylov observations ( $r^2=0.97$ ) and a low bias ( $-0.9^\circ\text{C}$ ). The incoming shortwave and longwave radiation and the wind-speed were also taken from ERA-i as none of these variables was recorded at Samoylov during the 2012-2013 snow season. ERA-I fields were proven to be a high quality source of driving variables to simulate the evolution of the Northern Eurasian snowpack including Siberia (Brun et al., 2013), with minor differences between station data and grid-field over large, rather flat areas like the Lena Delta. A comparison of ERA-i with locally acquired meteorological data from earlier years at Samoylov furthermore confirmed this validity for the skin surface temperature, which responds very sensitively to differences in the driving variables (Langer et al., 2013). Snow depth data, meteorological data, and data on the ground thermal conditions at Samoylov during the 2012-2013 snow season are presented in Fig. 2. Meteorological and snow depth data are freely available at <https://doi.org/10.1594/PANGAEA.879341>.

### 2.5 SNOWPACK snow model

SNOWPACK is a one-dimensional, physically-based snow-cover model. Driven by standard meteorological observations (see Meteorological data), the model simulates the stratigraphy, microstructure, metamorphism, temperature distribution, and

settlement of snow, as well as surface energy exchange and mass balance. Snow is represented by a number of state variables (temperature, density, and water content) and the snow micro-structure by grain characteristics (grain size, size of bonds, sphericity, and dendricity) which allow a diagnostic of the grain type (Lehning et al., 2002b). The equations governing the evolution of the seasonal snowpack are described in Bartelt and Lehning (2002) and Lehning et al. (2002a, b), along with the parameterizations adopted for important snow properties, such as  $K_{eff-z}$ . The latter is based on the work of Adams and Sato (1993), who considered the geometrical arrangement of spherical ice grains to derive an analytical formulation for  $K_{eff-z}$ . The thermal effect of water vapour diffusion within grain interstices and the temperature dependence of ice conductivity are also taken into account in the parameterization currently used in SNOWPACK. A shape factor calibrated with alpine snow is used to take into consideration the non-sphericity of the snow grains. The SNOWPACK formulation for  $K_{eff-z}$  depends in the end on three variables: temperature, density and the ratio between grain-size and bond-size.

The SNOWPACK model was originally developed for alpine conditions (Lehning and Fierz, 2008) but has been recently adapted to different snow and meteorological conditions at the instance of the extreme conditions of the Antarctic Plateau at Dome C: the latter required a specific treatment of the effects of high wind speeds and low temperatures on snow accumulation, compaction and settlement (Groot-Zwaaftink et al., 2013).

## 15 2.7 CryoGrid3 permafrost model

CryoGrid3 (CG3, Westermann et al., 2016) is a one-dimensional permafrost-soil model that has been extensively adapted and validated for the Samoylov conditions (Westermann et al., 2016; Langer et al., 2016). Since the soil scheme in SNOWPACK lacks the detail and performance of CG3, we used CG3 to model the ground thermal regime but using the snow characteristics (density, depth, and bulk thermal conductivity) produced by SNOWPACK as input.

20 CG3 is forced by standard meteorological variables (see Section 2.4: Meteorological data) which drive an explicit surface energy balance scheme that simulates the exchange of heat and water with the atmosphere. The model includes a transient heat transfer scheme for the soil that is specifically optimized for simulating freeze-thaw processes within permafrost. The soil physical properties such as heat capacity, thermal conductivity, and the freeze curve, are derived according to a parameterization suggested by Dall Amico et al. (2011). The soil composition is assumed to be constant, so that any changes in soil moisture other than those due to phase changes are ignored. This assumption is well justified as the soils at Samoylov are almost completely saturated (Langer et al., 2013). CG3 also includes a simplified snow cover representation that only takes into account a limited number of the natural processes that occur in snowpacks. It is therefore not comparable to more sophisticated snow models such as SNOWPACK or CROCUS. Therefore, in our simulations with CG3, the snow properties involved in conductive heat transfer were taken either from SNOWPACK simulations (in Sect. 5) or derived from an external construction (in Sect. 6), by-passing the CG3 estimates for these properties. All other properties or processes were calculated by CG3: this includes an exponential damping of incoming short wave radiation with snow depth, assuming a constant light extinction coefficient (e.g. O'Neill and Gray, 1972), and a snow albedo decreasing with snow ageing (Westermann et al., 2016).



### 3 Thermal properties of the Samoylov snowpack

#### 3.1 Composition and properties of individual layers

**Paragraph inversion, text condensing** As in other tundra snowpacks described in literature, the Samoylov snowpack was largely made up of basal DH and of wind slabs with small rounded grains (RG) (Fig. 3 and Fig. 4). Based on the 4 profiles investigated by CT, the DH layers and wind slabs exhibited significantly distinct densities and  $K_{eff-z}$  (Fig. 3, p-values < 0.05 for a 2-sided t-test): the DH layers had a mean density of 236 kg m<sup>-3</sup> and a mean  $K_{eff-z}$  of 0.22 W m<sup>-1</sup> K<sup>-1</sup>, while wind slabs had a mean density of 356 kg m<sup>-3</sup> and a mean  $K_{eff-z}$  of 0.36 W m<sup>-1</sup> K<sup>-1</sup>. The general characteristics of the snowpack at the CT sites (grain types, snow depth, DH thickness-to-total snow depth ratio) were very similar to the median characteristics retrieved at the other snowpits dug in each micro-topographic class (Figure 7), which made them representative for their micro-topographic class. The only exception is the CT slope profile, which features an exceptionally high proportion of DH (80 %, while the median for slope sites was 50 %).

In the middle or upper part of the snowpack at vegetated sites, we found DH layers exhibiting a higher density (up to 300 kg m<sup>-3</sup>), together with a higher conductivity (above 0.3 W m<sup>-1</sup> K<sup>-1</sup>), higher hand hardness (2 to 3) and smaller grain sizes (1 to 2 mm) than basal DH (hand hardness 1, grain size 5 to 10 mm). These dense DH layers have probably been formed by the metamorphism of former wind-crusts (i.e. they are indurated DH), thereby retaining a high density. They were all found above the vegetation layer, where wind effects are likely to be more pronounced.

#### 3.2 Spatial variability

**Title change, paragraph merging, text condensing** Micro-topography and surface conditions clearly play a role in shaping the snowpack conditions at Samoylov. Based on our 16 snowpits and 4 CT profiles, we found the snow to be significantly deeper at slope sites and shallower at rim sites (27 cm vs. 10 cm median depths, p-value < 0.1 for a two-sided t-test) than at the center sites (19.5 cm median depth). This observation that has often been reported in literature from other tundra sites (e.g. Wainwright et al., 2017): indeed, the rim sites are the most exposed to wind and receive reduced deposition during blowing snow events, while slopes, especially those on the lee side, experience lower wind speeds and enhanced deposition. The larger number of distinct snow layers found in slope profiles is a further evidence of that process. In contrast to snow depth, the DH thickness-to-total snow depth ratio (hereafter  $\alpha$ ) was lower on slopes and higher on rims (0.5 vs. 0.8, median values, difference not significant at the 95% level). Rim profiles also exhibited a larger proportion of DH-chains (i.e. vertically structured DH crystals in which most of the lateral bonds have disappeared; Fierz et al., 2009) than the other micro-topographic classes: this is in line with an increased temperature gradient as a result of shallower snow depths. Grass-center and ice-center sites had very similar snow depths but a significantly lower proportion of DH was found at ice-centers than in the other classes. This is easily explained by the higher conductivity of ice when compared to frozen ground (even saturated) which promotes colder temperature in the uppermost centimeters of frozen ponding water than in a frozen ground

surface, and hence reduced temperature gradients through the snow when snow onset occurs after initial freezing. Basal DH crystals formed over ice are therefore smaller (4 mm to 6 mm) than those found at grass-center sites (6 mm to 8 mm).

We calculated the bulk  $K_{eff-z}$  ( $K_{bulk}$ ) at each CT site by weighted harmonic mean of the  $K_{eff-z}$  of individual snow layers.  $K_{bulk}$  showed little variation between the three CT sites with underlying grasses:  $K_{bulk}$  was  $0.21 \text{ W m}^{-1} \text{ K}^{-1}$  at the CT rim and slope

5 sites and  $0.23 \text{ W m}^{-1} \text{ K}^{-1}$  at the CT grass-center site (

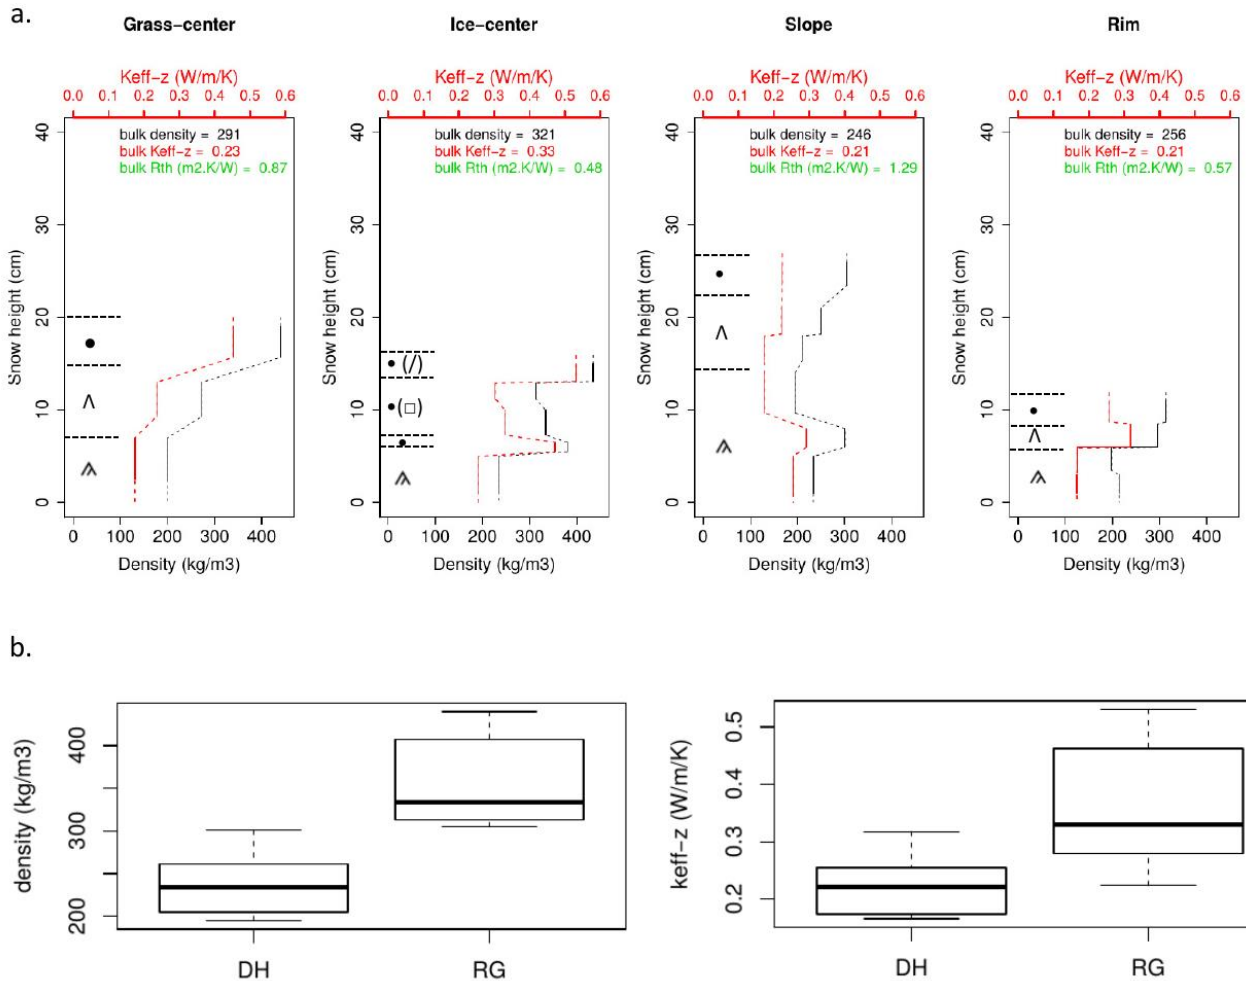

Figure 6). A more representative slope site with a lower proportion of DH portion would probably have had a slightly higher  $K_{bulk}$  value. A much higher  $K_{bulk}$ ,  $0.33 \text{ W m}^{-1} \text{ K}^{-1}$ , was however obtained at the ice-center site, where the much less DH had developed.

10 We tested the assumption that differences in the DH-thickness to total snow depth ratio ( $\alpha$ ) can mostly explain the variability in  $K_{bulk}$  across the four CT sites. For this we relied on the approach by Zhang et al. (1996), who considered that an Arctic snowpack can be approximated by two homogeneous layers, a DH layer and a wind-slab, each with its own distinctive

density and  $K_{eff-z}$  value. Rutter et al. (2014) also used a similar approach for microwave emission modelling. Following this approach,  $K_{bulk}$  is expressed by:

$$K_{bulk} = \frac{1}{\frac{\alpha}{K_{DH}} + \frac{1-\alpha}{K_{crust}}} \quad (1)$$

where  $K_{DH}$  and  $K_{crust}$  are the  $K_{eff-z}$  for DH and wind crust layers, which we here approach by their mean values in our CT samples (0.22 W m<sup>-1</sup> K<sup>-1</sup> and 0.36 W m<sup>-1</sup> K<sup>-1</sup>, respectively).  $K_{bulk}$  is thus a decreasing function of  $\alpha$ . We found that 72 % of the variability in  $K_{bulk}$  between our four sites can be explained by this simple 2-layer approach.

The insulating power of a snowpack is characterized by the thermal resistance  $R_{th} = HS / K_{bulk}$  (see Introduction). Hence, the variations in snow depth  $HS$  across our four sites, as shaped by micro-topography (see Section 3.1), also affect the local insulating power of the snowpack. Indeed, we found that the ice-center profile has a very low  $R_{th}$  (0.48 m<sup>2</sup> K W<sup>-1</sup>) due to a high  $K_{bulk}$  and a moderate snow depth. The  $R_{th}$  of the snowpack however increases from the rim site (0.57 m<sup>2</sup> K W<sup>-1</sup>), through the grass-center site (0.87 m<sup>2</sup> K W<sup>-1</sup>), to the slope site (1.59 m<sup>2</sup> K W<sup>-1</sup>): this increase follows the increase in snow depth between these sites (from 10 cm to 19.5 cm and 27 cm, respectively), despite variations in the  $K_{bulk}$  values (which at times also increase with snow depth).

Our observations suggest that, when there is basal vegetation present,  $R_{th}$  is more sensitive to variations in total snow depth than to variations in the DH proportion  $\alpha$ , which controls  $K_{bulk}$ . We assessed this by looking at the sensitivity of  $R_{th}$  to  $\alpha$  and  $HS$  in the 2-layer approach.  $R_{th}$  is expressed by:

$$R_{th} = \frac{\alpha.HS}{K_{DH}} + \frac{(1-\alpha).HS}{K_{crust}} \quad (2)$$

implying a sensitivity to variations in  $HS$  ( $\frac{\partial R_{th}}{\partial HS}$ ) and a sensitivity to variations in  $\alpha$  ( $\frac{\partial R_{th}}{\partial \alpha}$ ) expressed by:

$$\frac{\partial R_{th}}{\partial HS} = \frac{\alpha}{K_{DH}} + \frac{1-\alpha}{K_{crust}} \quad (3)$$

$$20 \quad \frac{\partial R_{th}}{\partial \alpha} = HS \cdot \left( \frac{1}{K_{DH}} - \frac{1}{K_{crust}} \right) \quad (4).$$

We estimated bounds of 3.5–4.3 m K W<sup>-1</sup> and 0.17–0.71 m<sup>2</sup> K W<sup>-1</sup> for these sensitivities, respectively, considering the following ranges for  $\alpha$  and  $HS$ :  $\alpha = 0.4$ – $0.9$  and  $HS = 0.1$ – $0.4$  m. The  $HS$  decreased by 0.1 m from the CT grass-center profile to the CT rim profile, while  $\alpha$  increased by 0.22. From the median grass center profile to the median slope profile,  $HS$  increased by 0.08 m while  $\alpha$  decreased by 0.06. With these orders of magnitudes, it appears clearly that variations in  $HS$  have a greater influence than variations in  $\alpha$  on the insulating power of snow across the polygonal micro-topography when there is basal vegetation present.

### 3.3 Assessment of existing $K_{eff-z}$ parameterizations

**Title change** In the four CT profiles  $K_{eff-z}$  showed a strong correlation with density ( $r = 0.94$ ). We investigated the ability of three different parameterizations for  $K_{eff}$  or  $K_{eff-z}$  to match the values obtained with our measurements (Figure 8). These parameterizations are from Calonne et al. (2011), Riche and Schneebeli (2013) and Löwe et al. (2013), and we refer to them hereafter as C2011, R2013 and L2013 respectively. C2011 expresses the mean of the vertical and horizontal components of  $K_{eff}$  as a density-based regression. R2013 expresses the vertical component of  $K_{eff}$  ( $K_{eff-z}$ ) as a density-based regression inferred from DH and faceted crystal (FC) samples only, that's to say: grain types with a marked vertical anisotropy. Finally, L2013 is a regression of  $K_{eff-z}$  based on density and anisotropy. It relies on an anisotropy parameter,  $Q$ , calculated directly from CT images based on the two-point correlation function (Löwe et al., 2013, their Eq. 4).  $Q$  is above 0.33 (resp. below 0.33) when the snow grains arrangement shows preferential vertical (resp. horizontal) connexions.

With respect to our data, there is an improvement in performance from C2011 (good correlation but noticeable bias) to R2013 (good correlation, reduced bias), and finally to L2013 (improved correlation and reduced bias). C2011 does not take anisotropy into account, nor does it attempt to represent the vertical component of the conductivity ( $K_{eff-z}$ ), which probably explains its relatively poor performance. A bias in R2013 for snow types with horizontal anisotropy ( $Q < 0.33$ ) is to be expected as R2013 is designed to represent the  $K_{eff-z}$  of vertically anisotropic grains. Our results confirm that R2013 is indeed biased on samples with  $Q < 0.33$  (Figure 8b), consisting of RG and partly decomposed/fragmented particles (DF). R2013 also underestimates  $K_{eff-z}$  in the samples with the greatest vertical anisotropy, which may be due to the very small number of samples (only 2) used by the authors to constrain their parameterization at densities greater than  $300 \text{ kg m}^{-3}$ . Being derived from a density-based regression, R2013 is furthermore structurally incapable of taking into account all possible degrees of anisotropy encountered in nature. The best performance was obtained with L2013, which confirms the importance of anisotropy in  $K_{eff-z}$  estimations. The two largest biases obtained from regressions based on density only (underestimations of  $K_{eff-z}$  by 47 % and 49 %) were obtained using C2011 on DH-chains, i.e. on highly anisotropic grain forms.

### 4 Adaptations of the SNOWPACK model to the Arctic context at Samoylov

In the Introduction we recalled that adaptations were required to the current generation of snow models if realistic density profiles (and consequently  $K_{eff-z}$  profiles) were to be simulated in Arctic conditions. These adaptations concerned wind densification (WIND), the water vapour transport occurring under steep temperature gradients (VAP), and the mechanical, optical and metamorphic effects of basal vegetation protruding into the snowpack (VEG). The traditional density-based formulations for  $K_{eff-z}$  also needed to improve and incorporate the effect of grain anisotropy (ANISO).

Some of the effects of VEG (mechanically reduced compaction, enhanced grain growth) and VAP (reduced density in the basal layers as a result of upward flux, enhanced grain growth) are hard to disentangle in Arctic conditions, where they both contribute to density reduction and enhanced grain growth in basal layers. Furthermore, no explicit description of water

vapour transport and associated metamorphism is available in the current snow models. We therefore chose to address both VAP and VEG together: both effects are comprised in the phenomenological “VEG” adaptation, described below.

For the mechanical effect of VEG we reduced the fresh snow density ( $\rho_0$ ) for snow that occurs within the grasses, i.e. up to a thickness of 7 cm. The underlying hypothesis are that i) while snow hasn't filled the snow-holding capacity of the basal vegetation, snow is not available for transport (Liston and Elder, 2006) and therefore snow accumulation in the grass-layer consists in precipitation particles of lower density than typical wind-blown rounded grains; and ii) that grasses form a rigid structure that protects snow from wind compaction and introduces macroscopic voids that reduce its density. Different  $\rho_0$  values were tested and  $150 \text{ kg m}^{-3}$  was chosen as giving the best match to end-of-season in situ density observations. Dominé et al. (2016a) chose to increase the dry snow viscosity in the CROCUS snow model by a factor of between 10 and 100, in order to take into account the limited snow compaction within the stems of shrubby vegetation. In our case, however, an alternative approach was required since self-compaction is very limited in the thin Samoylov snowpack. Note that our approach however differs from the SnowModel (Liston and Elder, 2006) in the sense that we focus on snow structure and properties (density,  $K_{th}$ ) as influenced by the wind conditions, while the SnowModel and its blowing snow sublimation and redistribution scheme SnowTran3D target the spatial distribution and time evolution snow-water-equivalent, and the way they are affected by vegetation.

The optical effect of VEG (i.e. the absorption of solar radiation by grasses and sandy impurities, which are common at Samoylov) was not taken into consideration but is addressed later in the Discussion section.

The metamorphic effect of VEG was addressed by enhancing bond and grain growth rates by a constant factor within the grasses-and-snow layer. This phenomenologically represents the favourable conditions for grain growth within airy vegetation layers. We feel justified in taking this approach because the current metamorphism and diffusion laws of the snow models are unable to reproduce the commonly observed grain sizes in excess of 10 mm in basal DH layers accommodating vegetation. A factor of 5 was selected as best reproducing the observed end-of-season DH grain sizes at Samoylov. Both bond and grain growth rates were enhanced by the same factor in order to keep their ratio constant, as this ratio governs a number of mechanical and thermal properties in SNOWPACK.

For WIND, we built on the work by Groot-Zwaafink et al., (2013) who designed an adaptation of SNOWPACK to Antarctica Dome C conditions. These authors considered that effective snow deposition on the surface occurs only during wind-events, i.e. periods when the wind speed averaged over 100 hours ( $U_{100-h}$ ) exceeds a  $4 \text{ m s}^{-1}$  threshold ( $U_0 = 4 \text{ m s}^{-1}$ ). The density of fresh snow ( $\rho_{newsnow}$ ) is then a logarithmic function of  $U_{100-h}$ :

$$\rho_{newsnow} = \rho_0 + \Delta\rho \cdot \log\left(\frac{U_{100-h}}{U_0}\right) \quad (5)$$

The use of this approach is justified at Samoylov as wind conditions at the Samoylov station (mean annual wind speed  $3.6 \text{ m s}^{-1}$ ) are comparable to those at Dome-C (mean annual wind speed  $2.9 \text{ m s}^{-1}$ ), and more than 50 % of snow deposition at Samoylov occurs during wind events. Groot-Zwaafink et al. (2013) used  $\rho_0 = 250 \text{ kg m}^{-3}$  as the lowest fresh-snow density. However, no value as low as that was recorded during the 2013 program from the wind slab layers at Samoylov, where the

density is always above  $305 \text{ kg m}^{-3}$ . Such densities are furthermore essentially achieved by wind compaction (settlement in thin arctic snowpacks is negligible). We therefore used  $\rho_0 = 305 \text{ kg m}^{-3}$  in Eq. (5). The original value for  $\Delta\rho$  ( $\Delta\rho = 361 \text{ kg m}^{-3}$ ) was retained.

For the ANISO adaptation we implemented in SNOWPACK an alternative formulation derived from L2013 (Löwe et al., (2013), their Eq. (5)), which by considering anisotropy, explained a larger part of the observed variability in our  $K_{\text{eff-z}}$  measurements than formulations relying solely on density. However, L2013 requires an anisotropy parameter Q, which can either be calculated from CT images of samples, or estimated from polarimetric radar data (Leinss et al., 2016), but is not yet included in current snow models. In order to implement L2013 in SNOWPACK we therefore had to derive an empirical relationship between Q and a modelled microstructural parameter. To this end, we used the data from Löwe et al. (2013) to obtain statistical regressions between Q and the optical equivalent diameter of snow grains. We calculated these regressions for different grain-type classes: rounded grains (RG), depth hoar (DH), faceted crystals (FC), decomposed-fragmented particles (DF), and melt forms (MF), most of which indicating reasonable linear dependences. These regressions were used in SNOWPACK in order to derive the parameter Q, using normalized grain size (within each grain type class) as a proxy for normalized optical diameter. We only took into account anisotropy for the RG, DH and FC grain types, as these are the dominant grain types in the Samoylov snowpack. Regressions coefficients and implementation details are in Appendix A. The three adaptations (WIND, VEG, and ANISO) can also be combined. Simulations were initially carried out for the default SNOWPACK setup (DEFAULT) and for each of these adaptations individually, but both the WIND and VEG adaptations proved to be essential for the Samoylov snowpack conditions to be reasonably well reproduced. Results are therefore shown in this paper for the following *setups*, each combining one or more *adaptations*. All setups except the one including the ANISO adaptation rely on the original  $K_{\text{eff-z}}$  parameterization from SNOWPACK described in Sect. 2.5.

- **DEFAULT**
- **WIND**
- **WIND + VEG**
- **WIND + VEG + ANISO**

## 5 Simulations of snow properties and ground thermal regime (grass-center site)

We carried out simulations with SNOWPACK and CG3 to represent the snow and ground conditions in the grass-center of the reference polygon, where the SNOWPACK snow forcing data were acquired (see Sect. 2.2.1) and CG3 soil properties calibrated (see Sect. 2).

### 5.1 Snow simulations

The adaptations to SNOWPACK enable a reasonable simulation of the Samoylov snowpack (Fig. 6 and Fig. 7), but both VEG and WIND adaptations are critical. While all setups consistently produce a thick basal depth hoar layer at the end of the

season, DEFAULT simulates a density profile that has too low a mean value ( $190 \text{ kg m}^{-3}$ ) when compared to the CT grass-center ( $290 \text{ kg m}^{-3}$ ) and to the average value for the four CT profiles ( $279 \pm 34 \text{ kg m}^{-3}$ ). This simulated density profile is also inverted, featuring higher values at the bottom and illustrating the typical bias highlighted by Dominé et al. (2016b) and Barrere et al. (2017). Bulk  $K_{eff-z}$  obtained using DEFAULT is likewise too low compared to observations ( $0.11 \text{ vs. } 0.23 \text{ W m}^{-1} \text{ K}^{-1}$  for the CT grass-center), and is also inverted. This low bias is likely to have caused the rapid growth of DH in this setup, as a low  $K_{eff-z}$  favours steep temperature gradients. The low density and  $K_{eff-z}$  biases can be corrected by using the WIND option, which in its current form tends to overestimate bulk density. However, the WIND option alone produces quite flat (i.e. vertically uniform) density and  $K_{eff-z}$  profiles. The VEG adaptation is then needed to produce a correct shape for these profiles, with higher values at the top and lower values at the base. Thus while the WIND option on its own reduces the DH growth due to dense and conductive bottom snow, the addition of the VEG option introduces lower densities and  $K_{eff-z}$  values for the basal layers and permits a more rapid and thicker growth of DH.

Combining the WIND and VEG options therefore yields reasonable simulations of bulk  $K_{eff-z}$  ( $0.20 \text{ W m}^{-1} \text{ K}^{-1}$ ) and density ( $305 \text{ kg m}^{-3}$ ). When the ANISO option is introduced (WIND+VEG+ANISO), the simulated bulk  $K_{eff-z}$  ( $0.24 \text{ W m}^{-1} \text{ K}^{-1}$ ) also agrees well with the CT grass-center estimate ( $0.23 \text{ W m}^{-1} \text{ K}^{-1}$ ), while the inter-layer variability in  $K_{eff-z}$  is enhanced, thus better reflecting the observed inter-layer variability (Figure 10). It is interesting to note that both the WIND+VEG and the WIND+VEG+ANISO setups produce a DH layer that is up to 10 cm thick at the end of the snow-season, above the vegetation layer: this means that former wind-crusts have been transformed into DH, producing the indurated DH layers reported in observations.

Finally, all SNOWPACK setups produce a thick layer of faceted crystals in the upper part of the snowpack, but faceted crystals were rare in the late April 2013 Samoylov snowpack (Figure 7). We interpret this as a likely bias in SNOWPACK that results in too rapid formation of faceted crystals. On the other side it is possible that a wind event on 10 April 2013 contributed to the high amount of RG found in the April 21 manual and CT profiles. Because it brought a very low accumulation at the SR50, this event was not captured in simulations with the WIND option.

## 5.2 Soil simulations

The ground thermal regime at the grass-center of the reference polygon was simulated by CG3 over the 2012-2013 snow season using snow properties calculated in SNOWPACK with the DEFAULT, WIND, WIND+VEG and WIND+VEG+ANISO setups, respectively. These simulations were compared with the soil temperature measurements from the same grass-center site. The reference polygon also hosts soil temperature measurements from a rim and a slope site: the spatial variability reflected in these three measurements was also considered and is referred to as "observed variability" in soil temperatures in both text and figures.

To analyse the modelling performances we split the winter into 4 phases:

- **Phase 1 – freezing:** 1 October (snow onset) to 7 November
- **Phase 2 – cooling:** 7 November to 20 February (dark winter followed by a period with low-angle solar radiation)

- **Phase 3 – warming:** 20 February to 5 May (melt-out date)
- **Phase 4 – thawing:** 5 May to 31 May

The WIND, WIND+VEG, and WIND+VEG+ANISO setups produced soil temperatures in good agreement with the grass-center measurements (Figure 11, Table 1), especially during freezing and cooling phases: the deviation from the measured soil temperatures when using the WIND+VEG+ANISO setup was of the same order of magnitude as the observed variability, while the deviations when using the WIND and WIND+VEG setups were slightly greater. The DEFAULT setup yielded a clear overestimation of soil temperatures at all depths, which could not be explained by the observed spatial variability in soil temperatures. This bias started during the freezing phase and persisted throughout the snow season; it is likely to be caused by the underestimation of  $K_{eff-z}$  in the DEFAULT setup (see Sect. 5.1), which also starts in the early snow season during rapid DH formation. In light of the good agreement between our  $K_{eff-z}$  estimates by CT and the simulated  $K_{eff-z}$  profiles in the WIND+VEG+ANISO setup (Sect. 5.1), we interpreted these results as confirming the soundness of our CT estimates for  $K_{eff-z}$ .

The performance of the WIND, WIND+VEG and WIND+VEG+ANISO setups deteriorated during the warming phase, when all simulations showed at first a systematic warm bias, which then turned into a cold bias at the start of the thawing phase. The warm bias during the warming phase suggested that limitations exist in the modelling of energy transfer processes within the snow, as here modelled by CG3. We formulated two hypotheses:

- Deficiencies in the parameterization of radiative heating within the snowpack may be involved as the bias concurs with the increase in shortwave radiation.
- The formation of an air layer at the base of the natural snowpack (as a result of mass depletion due to a sustained upward vapour flux throughout the winter) may increase its insulating power as the season advances. The formation of such an air layer within an Arctic context has previously been reported by Dominé et al. (2016b) but is not represented in the adapted SNOWPACK and therefore in the thermal properties passed to CG3.

We tested the thermal impact of both hypotheses by conducting sensitivity simulations in which:

- (i) The penetration of radiation into the snowpack was switched off in the CG3 model. This was done for the four SNOWPACK setups.
- (ii) We inserted an air-layer (with  $K_{eff-z} = 0.024 \text{ W m}^{-1} \text{ K}^{-1}$ ) at the base of the snowpack during the warming phase, growing in a linear fashion from 0 to 1.5 cm during the warming phase. This was done by modifying the snow properties from the WIND+VEG+ANISO setup, and resulted in a linear reduction in bulk  $K_{eff-z}$  from 0.23 to  $0.16 \text{ W m}^{-1} \text{ K}^{-1}$  over that period.

Suppressing the penetration of solar radiation in the snowpack considerably reduced the warm biases in soil temperatures during the warming phase for all WIND setups, while leaving their performances during the freezing and cooling phases unaffected (Figure 12). While physical reasons for a likely bias in radiative transfer in CG3 will be advanced in section 7, the remaining simulations in this study were carried out with the solar radiation penetration switched off. The air-layer



hypothesis did not, however, lead to any visually identifiable change in the simulations. This reveals a very low sensitivity of the soil thermal regime to variations in snow thermal conductivity during the warming phase.

## 6 Thermal implications of snow spatial variability

**Simplification** We made use of data from the reference polygon transect to more thoroughly characterize the spatial variability in snow depth, structure and insulating power across the polygonal tundra at Samoylov. We extracted DH thickness and snow depth at 31 points with 50 cm spacing along the transect, by post-processing of the NIR images (Fig. 1e, Sect. 2.2.1). The 2-layer approach by Zhang et al. (1996) (see Sect. 3) was then used to infer bulk  $K_{eff-z}$ ,  $R_{th}$ , and density at these 31 points at the time of the field observation (21 April 2013), relying on Eq. (1) and Eq. (2). Time series of these bulk snow properties were then computed, based on the 2-layer approach and time-evolution of the DH properties as simulated by the WIND+VEG+ANISO setup providing the best match to observed snow characteristics. Wind slab properties were considered constant in time and equal to their end-of-season values (mean of CT-estimates for wind slabs from April 2013 samples; Table 2). The hypotheses behind the construction of these time-series and other relevant details are given in Appendix B.

This approach lead to a small spread in  $K_{bulk}$  during the whole snow season (from  $0.22 \text{ W m}^{-1} \text{ K}^{-1}$  to  $0.29 \text{ W m}^{-1} \text{ K}^{-1}$ ) and a much higher dispersion in  $R_{th}$  (from  $0.45 \text{ m}^2 \text{ K W}^{-1}$  to  $1.2 \text{ m}^2 \text{ K W}^{-1}$ ), which reaches a maximum towards the end of the season where it covers a range similar to that inferred from CT analysis at the 3 CT sites with basal vegetation (from  $0.48 \text{ m}^2 \text{ K W}^{-1}$  to  $1.59 \text{ m}^2 \text{ K W}^{-1}$ ; Fig. B2)

When driving CG3 simulations of the ground thermal regime, these 31 different snow insulation time-series resulted in a pronounced spread of the simulated soil temperatures, which we refer to as “modelled variability” (Figure 13). Comparison to soil temperature observations from rim, slope and center, revealed that the modelled variability encompasses the observed variability in soil temperature (Figure 13), which is a desirable feature. However, the modelled variability is much higher than the observed one, especially during the cooling phase when it reaches  $6.3 \text{ }^\circ\text{C}$  at 5 cm depth while the observed one does not exceed  $2 \text{ }^\circ\text{C}$ . For different reasons, it is likely that the rim, slope and grass-center soil temperature observations captured only part of the thermal impact of snow spatial variability at Samoylov: first, because of the small sample size (only 3 observations) ; second, due to possible lack of representativity of the snow conditions on top of the soil sensors (they were not co-located with the CT samples, and snow was not characterized on top of them to avoid destruction of the snowpack) ; and third, because these soil temperature observations are also affected by spatial variability in the soil's thermal properties, which may interfere with any thermal effect solely due to snow variability. Additionally, lateral heat fluxes tend to smooth out any spatial variability in soil temperature, and they are not represented in our modelling. Finally, we also noticed that the measured rim and slope temperatures, which determine the maximum amplitude of the spread in the observations, responded differently at the beginning of the cooling phase, with the temperature dropping rapidly for the slope profile in early November but only gradually for the rim profile. This behaviour reversed from early December until the end of the cooling

phase, with the spread in observed temperatures between a colder rim and a warmer slope reaching its maximum. The contrasting behaviour of rim and slope in November can be explained by several processes (e.g. contrasted early-season wind erosion/deposition, differences in the late autumn soil water content affecting the zero-curtain duration and soil cooling dynamics, etc) which are not captured by our modelling and may have limited the magnitude of the spread in observed temperatures.

During the warming period the variabilities in both modelled and observed soil temperatures are considerably reduced. Warming from the air is more efficient at sites with little snow insulation, which exhibit the coldest soil temperatures during the cooling phase, than at sites with a higher snow insulation. This explains the reduction in the spread of soil temperatures after the month of April. However, the reduction in the spread of simulated and observed soil temperatures starts earlier, in late February. This again indicates a reduced sensitivity of the ground thermal regime to variations in the thermal properties of the overlying snow during the whole warming phase (cf. the sensitivity experiment with the insertion of a basal air layer in Sect. 5.2). This reduced sensitivity will be analysed in section 7 below.

Finally, our more thorough assessment of the spatial variability in soil temperatures here, provides increased confidence to disqualify the simulations from the DEFAULT SNOWPACK setup: this setup was rejected in section 5 as yielding soil temperatures that were too far above the observed range. Despite a spread in simulated soil temperatures larger than in the observations, our conclusion regarding the DEFAULT setup remains unchanged as it yields soil temperatures also beyond the range of the simulated ones.

## 7 Discussion

### 7.1 Comparison with snow data from similar contexts

The Samoylov snowpack shows similarities in its stratigraphy with Arctic snowpacks described previously by Dominé et al. (2015, 2016b) and Derksen et al. (2009). The tundra snowpacks investigated by these authors along a sub-arctic traverse comprised on average 65 % DH and had a mean density of 319 kg m<sup>-3</sup>. Both of these values are close to those from Samoylov (54 % and 279 kg m<sup>-3</sup>, resp.). The minor differences are probably due to differences in the wind conditions and the specific micro-topography of Samoylov, where some samples were collected from wind-sheltered slope/center sites or over frozen ponds. Derksen et al. (2009) also investigated the differences between snowpacks overlying lake ice, river ice, and tundra sites, identifying larger proportions of DH over ice, which is contrary to our own results. However, their study considered lake or river ice overlying liquid water that is warmer than the surrounding soil. This thermal contrast enhances the development of faceted grains. In contrast, the end-of-summer water level at the sampled ice-center site on Samoylov was shallow, and shortly after freezing the ice extended to the ground, so that there could not be any enhanced thermal contrast created by an underlying, relatively warm, body of liquid water.

There are few published observations or reports on the thermal properties of Arctic tundra snow. To our knowledge, the Samoylov samples are among the first samples of tundra snow to be analysed by CT. Publications by Dominé et al. (2015,

2016a, 2016b) and Barrere et al. (2017), which relied on NP measurements and a refined retrieval algorithm for  $K_{eff}$ , probably provide the most extensive thermal characterization of Arctic and sub-arctic snowpacks in recent years. These authors reported values of  $K_{eff}$  lower than our  $K_{eff-z}$  estimates, both for DH layers and for the bulk snowpack. Barrere et al. (2017) measured  $K_{eff}$  values no higher than  $0.12 \text{ W m}^{-1} \text{ K}^{-1}$  for basal DH in the May 2014 and 2015 snowpacks at Bylot Island (Baffin Island, Canada); they however reported much higher conductivities ( $0.37 \text{ W m}^{-1} \text{ K}^{-1}$ ) for indurated DH. After correcting for a 20 % systematic error associated with the NP method, these authors calculated bulk  $K_{eff}$  values of less than  $0.1 \text{ W m}^{-1} \text{ K}^{-1}$  for the 2014 and 2015 Bylot snowpacks, resulting in highly insulating snow (bulk  $R_{th}$  values of 2.6 and  $5.8 \text{ m}^2 \text{ K W}^{-1}$ ). We estimated a bulk  $R_{th}$  of  $0.87 \text{ m}^2 \text{ K W}^{-1}$  for our CT grass-center profile and a high upper bound of  $1.59 \text{ m}^2 \text{ K W}^{-1}$  for the CT slope profile. The  $R_{th}$  values obtained by Barrere et al. (2017) indicate insulation that is closer to the end-of-season insulation simulated by the DEFAULT setup in SNOWPACK ( $R_{th} = 1.75 \text{ m}^2 \text{ K W}^{-1}$  in April 2013). This setup led to an overestimation of February soil temperatures at Samoylov by about  $6 \text{ }^\circ\text{C}$ . Such a bias can hardly be explained by the spatial variability in snow conditions (see Sect. 6). Despite the disagreement with published estimates for  $K_{eff}$  under similar conditions, the consistency of the CT estimates for  $K_{eff-z}$  with recent parameterizations and with measured soil temperatures after combined snow-soil modelling provides some confidence in them. The Samoylov snowpack appears more conductive than the 2013-2014 and 2014-2015 snowpacks observed at Bylot Island. Furthermore, our results compare very well with the conductivities obtained using inverse modelling by Jafarov et al. (2014) at Deadhorse (Alaska), a site with snow and meteorological conditions similar to Samoylov.

We estimate that the ground temperature spread induced solely by snow spatial variability can reach  $6.3 \text{ }^\circ\text{C}$  in the coldest part of the winter at Samoylov (Sect. 6). This estimate is consistent with those in previous publications: Sturm and Holmgren (1994) observed maximum differences in ground surface temperatures of up to  $19.1 \text{ }^\circ\text{C}$  and mean winter temperature differences of up to  $7.2 \text{ }^\circ\text{C}$ , between the tops and hollows of grass tussocks at Imnavait Creek, Alaska. Their investigations focused on smaller scale micro-relief (tenths of a cm) than ours, resulting from grass tussocks in the tussock tundra. Our study complements the sensitivity study by Zhang et al. (1996), who found a  $12.6 \text{ }^\circ\text{C}$  spread in winter ground surface temperatures following an increase in the proportion of DH from 0 % to 60 % at West Dock near Prudhoe Bay, Alaska. This study included neither an observation-based range of the proportions of DH in the snowpack, nor the effect of co-varying DH thickness and snow depth. Furthermore, the DH and wind crust properties were kept constant over time. More recently, Gisas et al. (2016) found a variability in ground temperatures of up to  $6 \text{ }^\circ\text{C}$  in the Norwegian mountains, as a result of spatial variations in snow depth.

## 7.2 Light penetration in the Samoylov snowpack

The penetration of solar radiation in the natural snowpack at Samoylov is likely to be reduced by wind-blown sediments within some of the snow layers (Boike et al., 2003) and by the dense wind crusts at the top of the snowpack (Libois, 2014). While absorption of solar light in these layers may result in a localized increase in temperature within the snowpack, it is unlikely to have much warming effect on the underlying snow and soil because of the insulating nature of the snow. Brun et

al. (2011) had to reduce the penetration depth of solar radiation in the CROCUS snow model in the same way that we did, in order to reproduce the snow temperatures at depths greater than 20 cm within the Antarctic snowpack at Dome C (Brun, E. personal communication). Libois, 2014 modelled a temperature reduction of  $\sim 7$  °C at 20 cm depth in the Dome-C snowpack in summer as a result of spatial variations in density between 150 and 300 kg m<sup>-3</sup> and consequent reduction in the penetration  
5 depth of solar radiation. Although radiative transfer models exist with fine spectral resolution that are able to circumvent this bias (Libois et al., 2013; Libois, 2014), these complex schemes are not implemented by default in operational snow models, which tends to hinder a proper representation of the underlying snow and soil thermal regime.

### 7.3 Temporal variations of the soil thermal sensitivity to snow properties

A key result of our ensemble simulations and observations is the increase in spatial variability in soil temperatures during the  
10 winter cooling phase and its reduction during the warming phase (Figure 13). We ascribe this behaviour to two physical mechanisms. First, winter cooling is characterized by very steep temperature gradients between atmosphere and soil (about 150 K m<sup>-1</sup>; see Fig. C1 in the Appendix), which are later reduced and eventually vanish during the course of the warming phase. From Fourier's law for vertical heat flux ( $q$ ):

$$q = -K_{eff-z} \cdot \frac{\partial T}{\partial z} \quad (6)$$

15 it is apparent that the sensitivity of the heat flux to  $K_{eff-z}$  is the temperature gradient. The greatest impact of spatial variations in  $K_{eff-z}$  on ground temperatures is therefore expected to occur when temperature gradients are at a maximum (i.e. during the cooling phase), while a far smaller impact is expected when temperatures gradients are low (i.e. during the warming phase).  
Second, the reduction in the temperature gradient during the warming phase allows the soil temperatures to equilibrate laterally. At locations with more conductive snowpacks (e.g. polygon rims) the soil responds more rapidly to warming air,  
20 which further reduces the difference between these soil temperatures and those in more insulated locations (e.g. polygon slopes): this also contributes to the reduction in spatial variability of soil temperatures during the warming phase.

### 7.4 Limitations of our approach and perspectives

In Arctic snowpacks the water vapour flux induced by the steep temperature gradients redistributes ice mass from basal to upper snow layers, so that the density of the basal layers may actually decrease unless there is compensation through  
25 moisture flux from the soil. On the basis of Eq. (7) in Riche and Schneebeli (2013) and snow temperatures simulated with the WIND+VEG and WIND+VEG+ANISO options, we estimate that about 2 kg m<sup>-2</sup> of ice is redistributed at Samoylov by this process between October and March. Unless sustained by soil water this flux could lead to a 1.3 cm thick ice-depleted layer at the base of the snowpack (assuming a basal density of 150 kg m<sup>-3</sup>). The magnitudes of soil and snow vapour fluxes are not currently well constrained by observations, and they are not represented in detailed snow models such as  
30 SNOWPACK or CROCUS. To bypass these shortcomings and still produce reasonable SNOWPACK simulations, we adopted a phenomenological parameterization for the combined effects of snow vapour flux and vegetation on basal snow

porosity. On the one hand, our adaptations to SNOWPACK are inherently local, tied to the specific Samoylov conditions, and should be verified at other tundra sites comprising co-located snow and soil observations together with a complete set of meteorological driving data. On the other hand, neither this approach nor the current observational datasets allow the retrieval of any dynamics in basal snow ice-depletion. A considerable uncertainty therefore remains regarding the thermal properties of snow in the early winter (cooling) period, when the sensitivity of ground thermal regimes to snow conditions is at its maximum. This uncertainty, together with uncertainty in the meteorological forcing that cannot be completely excluded, also affects our estimates of the thermal impact of snow spatial variability. Continuous monitoring of ice depletion at the base of the snowpack, and snow monitoring programs focusing on the early and dark winter periods at well instrumented sites (see above), would help to provide better constraints for the thermal characteristics of the snowpack and the underlying metamorphic processes at this time, yielding substantial benefits for the next generation of coupled snow-soil models.

It also appears indispensable to include a more systematic and comprehensive treatment of anisotropy in snow models than the coarse diagnostic based on grain size and type that we have used, with a consistent link between water vapour flux, temperature gradient metamorphism, and anisotropy and with feedbacks on the mechanical (Srivastava et al., 2016), thermal, and optical properties of the snow. A promising way to further assess the relevance of anisotropy to the conductivity and the ground thermal regime may be to incorporate remote sensing observations. It has been recently demonstrated (Leinss et al., 2016) that the depth-averaged anisotropy parameter ( $Q$ ) of a snowpack can be estimated from polarimetric radar data such as, for example, that available from the TerraSAR-X satellite. Such an analysis could be used to produce global maps of the average anisotropy of snowpacks, as an indication of their metamorphic state.

Our combined SNOWPACK and CG3 simulations show a cold bias during and after melt-out. Hydrological processes within the snowpack related to thaw and rain are known to have an important influence on soil thermal dynamics, as has been emphasized in a large number of publications (e.g. Marsh and Woo, 1984a, b; Putkonen, and Roe, 2003; Westermann, 2009). In naturally stratified snowpacks, water percolation and the associated heat transfer during early melt periods occur in part through "flow fingers", which are preferential infiltration paths through the snow cover that penetrate into the colder substrata (snow layers or soil), where they refreeze, releasing latent heat (Marsh and Woo, 1984a, b). This process is known to delay the bulk melting of the snowpack, while at the same time accelerating soil warming. Progress has recently been made in the representation of preferential flow features by applying the Richards equation to water flow within a snow matrix (Wever et al., 2015; D'Amboise et al., 2017), but their impact on soil temperatures has not yet been assessed. Snow schemes used in permafrost models such as CG3 do not currently represent these processes, inducing significant biases in the melt period.

Finally, we assessed the impact of snow spatial variability linked to micro-topography, on the ground thermal regime. Our approach disregards the spatial variability in soil properties and soil saturation, which is also related to micro-topography, as well as the lateral heat fluxes between different landscape units. Distributed, 3-dimensional simulations that include the effect of snow redistribution by wind and spatial variations in soil conditions could, in theory, support a more consistent

assessment of spatial variability in soil temperatures. However, they require a considerable amount of in situ data that is currently unavailable even at the most instrumented sites (Kumar et al., 2016). Models that have lower degrees of complexity but inherently account for spatial variability in snow and soil conditions within a statistical framework (e.g. Gissnas et al., 2016) provide a promising alternative and will benefit from the enhanced understanding that we have achieved of the links between micro-topography and snow insulation.

## 8 Conclusion

Mixing in-situ observations, cold laboratory analysis, and modelling, our work contributed to an improved characterization and understanding of the properties and spatial variability of an Arctic polygonal tundra snowpack and its role in shaping the underlying permafrost thermal regime during winter. Snow depth, which showed a strong correlation with micro-topographical features, was found to be a crucial driver of the insulating power of snow over vegetated surfaces. The proportion of DH in the snowpack, which showed a weaker correlation with micro-topography, introduced a second-order control. Water-logged polygon centers in which basal ice forms during winter, were an exception to this rule of thumb due to weak DH formation resulting in conductive snowpacks despite intermediate snow depths.

The CT technique allowed estimates to be made of the thermal conductivity and anisotropy of Arctic snow samples that were mainly of depth hoar and wind slabs with rounded grains. The retrieved properties confirmed the validity of a recent anisotropy and density-based parameterization of  $K_{eff-z}$ , that had not previously been tested on Arctic snow samples. A comparison with other regressions for  $K_{eff-z}$  highlighted the importance of taking anisotropy into account in  $K_{eff-z}$  formulations, especially for depth hoar.

Phenomenological adaptations of the SNOWPACK snow model to the Samoylov conditions, related to wind densification and the combined effect of basal vegetation and strong water vapour flux in the lower snowpack, enabled the simulation of snow density and  $K_{eff-z}$  profiles in good agreement with our CT estimates. Introducing anisotropy considerations in the formulation of  $K_{eff-z}$  used in the model resulted in further improvements. These adaptations jointly allowed improved simulations of the soil temperatures, providing further support for the soundness of our CT estimates for  $K_{eff-z}$ .

We also estimated the impact of the natural snowpack spatial variability on the underlying permafrost thermal regime during an entire winter, based on our  $K_{eff-z}$  and density observations and on our understanding of the snowpack dynamics. Beyond this quantitative estimate, which is intrinsically tied to the local climatology and micro-topography of our site, an important conclusion is that the sensitivity of the ground thermal regime to the overlying snow reaches a maximum during the cooling winter period, when temperature gradients between atmosphere and soil are at their steepest. It is therefore crucial to better constrain the thermal properties of snow and the relevant processes during the first half of the winter, a period that is often less well monitored due to the dark and harsh winter conditions.

Finally, our study pinpointed processes that exert an important control on the ground thermal regime of tundra regions while being neglected in the snow schemes of general circulation models or earth system models (e.g. Wang et al., 2013): the

effect of wind compaction and DH growth on the insulating power of tundra snow, as well as the enhanced extinction of solar radiations in by dense wind-crusts within the snowpack. This suggests possible ways to improve snow representation over the Arctic regions in these models, of benefit for permafrost-related processes.

5

## 9 Figures and Tables

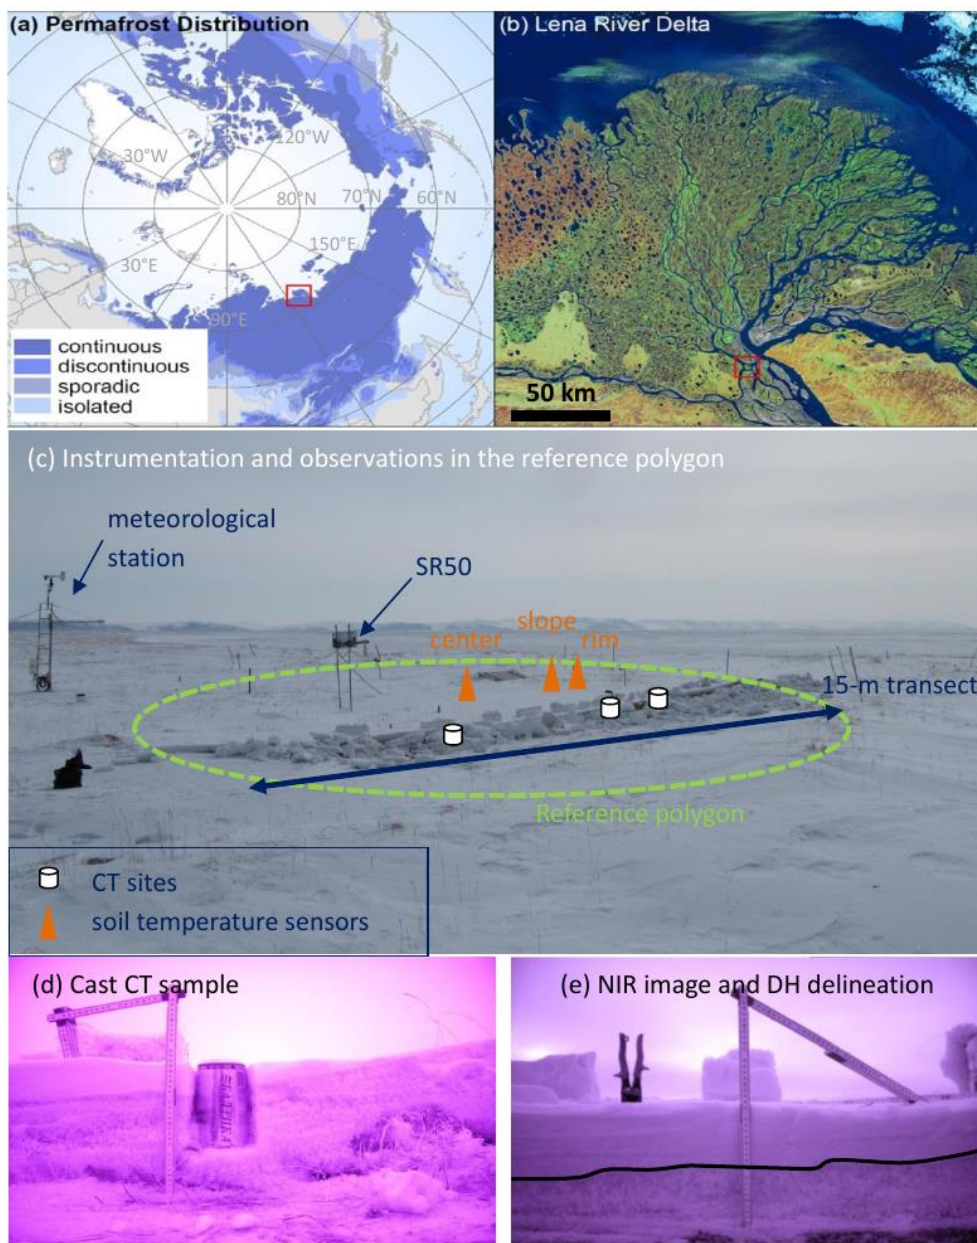

**Figure 4:** Location of the Samoylov permafrost observatory within the continuous permafrost zone, Lena River Delta (a, b); instrumentation and observations in the reference polygon (c); cast CT sample (d); and NIR image of a transect's wall with the upper boundary of the DH layer delineated (e). See main text for abbreviations.



### Meteorological, snow and soil conditions at Samoylov

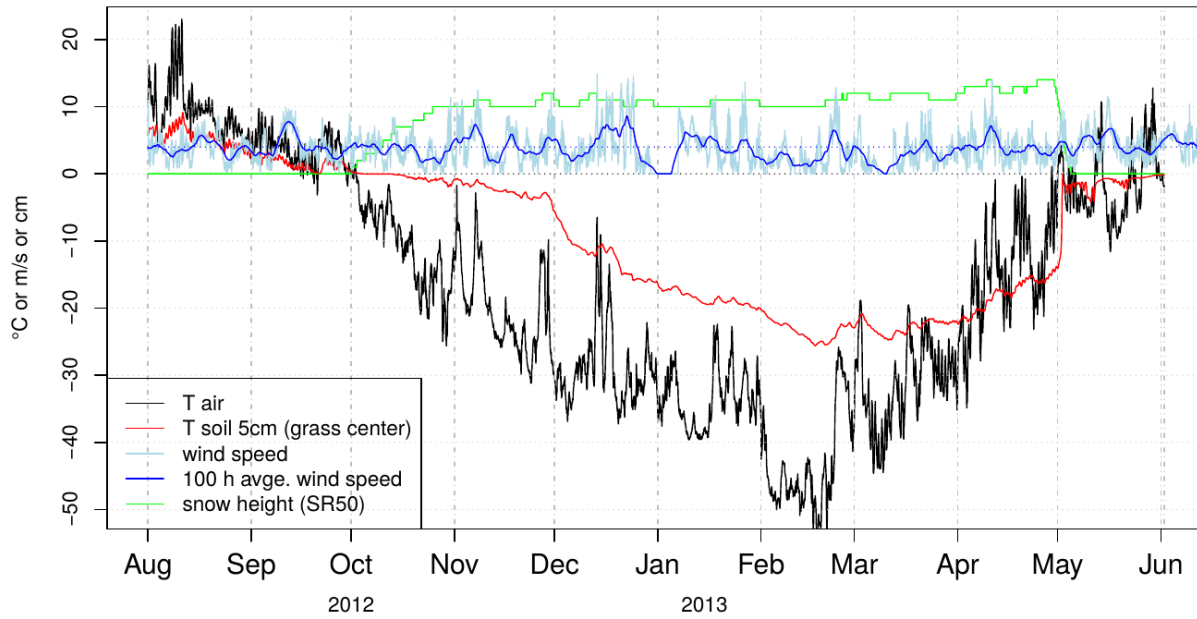

Figure 5: Meteorological, snow and soil conditions at Samoylov over the 2012-2013 snow season.

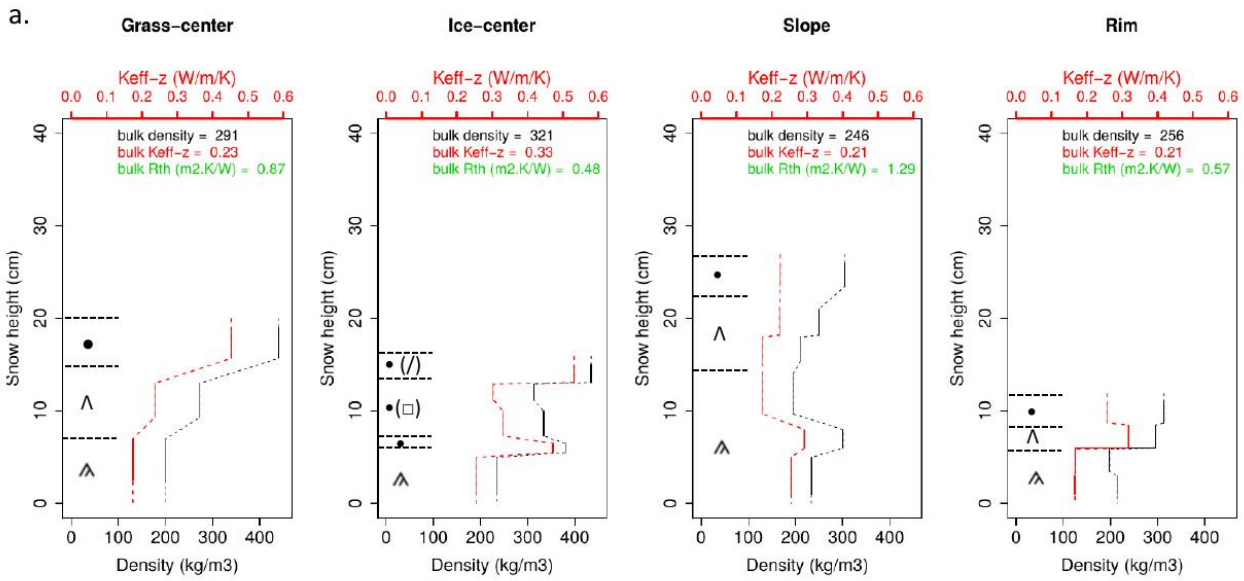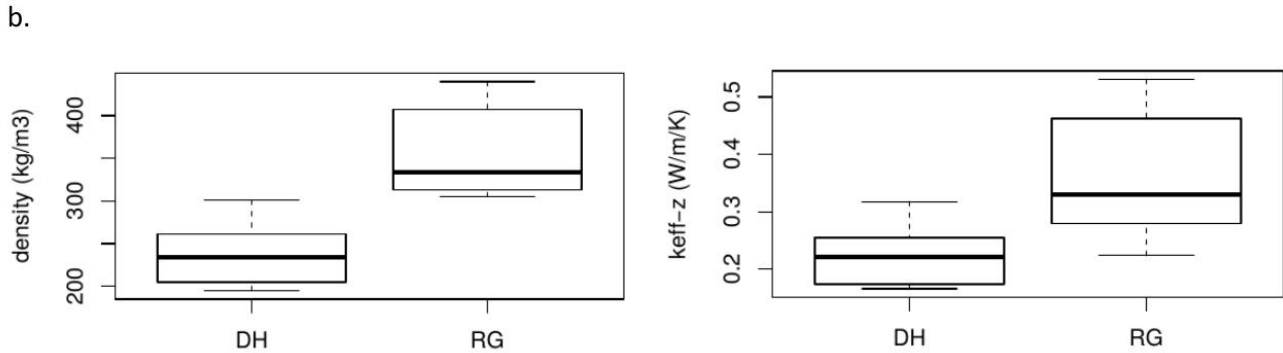

**Figure 6: (a) Grain shape, density and  $K_{eff-z}$  profiles from the four CT sites. Density and  $K_{eff-z}$  values are represented by piecewise constant functions over the layers where the CT analysis was performed; these segments are connected by a dashed line as a guide to the eye. Symbols for the grain shapes originate from Fierz et al. (2009). When several grain shapes coexist within a layer, the dominant type is listed first. (b) Boxplots of density and  $K_{eff-z}$  for individual DH layers (11) and rounded grain (RG) layers (8) found within the CT profiles. RG shapes were occasionally associated with faceted crystals and decomposing and fragmented precipitation particles.**

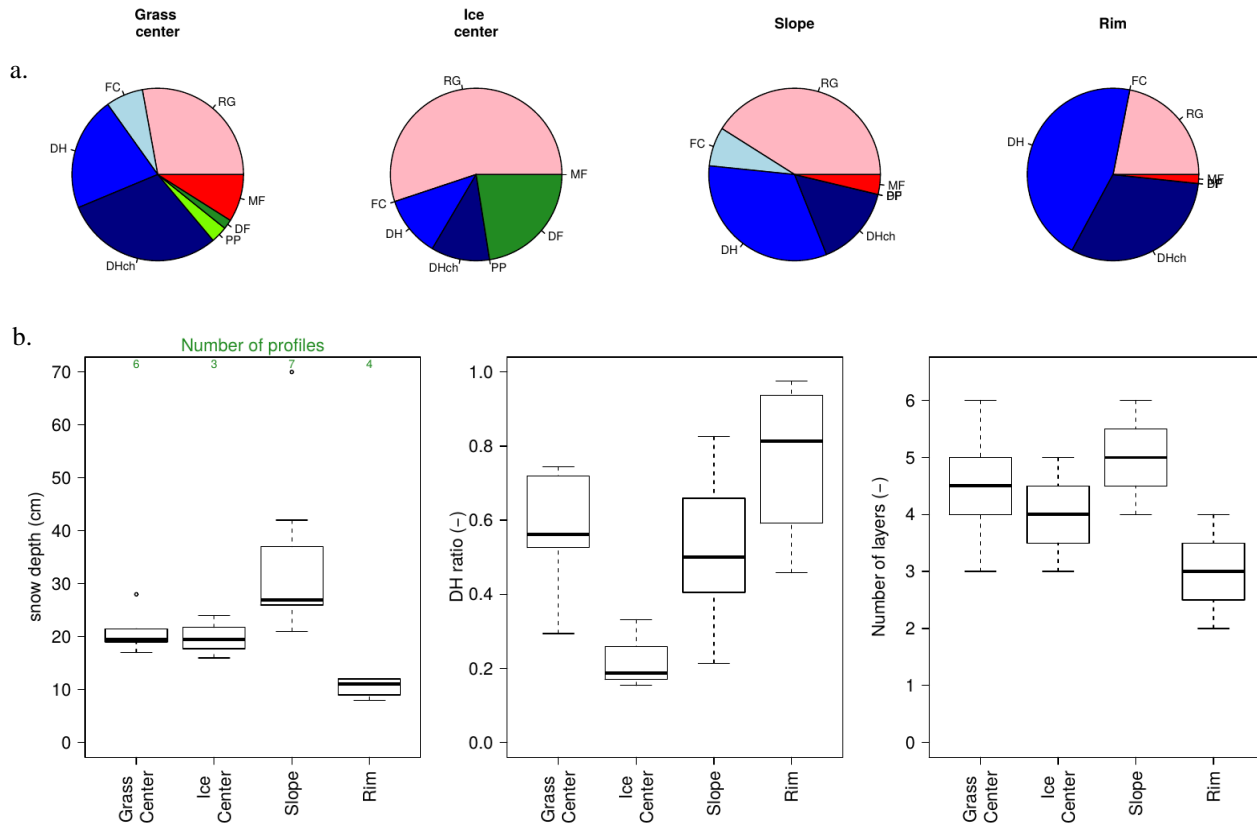

5 **Figure 7: Mean composition (a) and median characteristics (b) of the Samoylov snowpack in the four micro-topographic classes. These statistics include the observations from the 16 snowpits and the four CT sites. DH ratio is the DH thickness-to-total snow depth ratio, also called  $\alpha$  in the manuscript. The abbreviations for the main grain types come from Fierz et al. (2009): PP=precipitation particles, DF=decomposing and fragmented precipitation particles, RG=rounded grains, FC=faceted crystals, DH=depth hoar, DHch=chains of DH, MF=melt forms.**

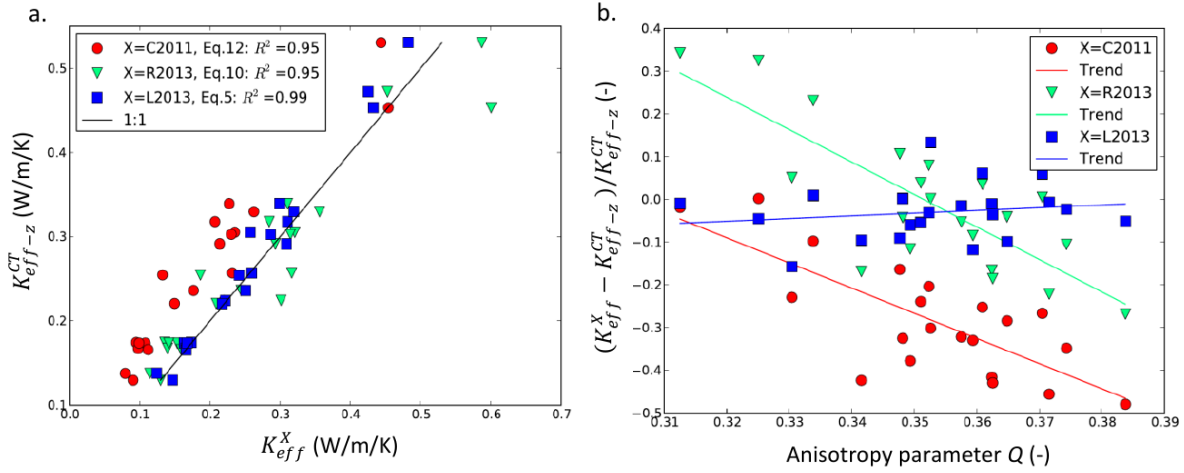

Figure 8 : a. Comparison between estimates of  $K_{eff}$  or  $K_{eff-z}$  made with the CT method ( $K_{eff-z}^{CT}$ ), and estimates made using parameterization “X” ( $K_{eff}^X$ , where X=C2011, R2013 or L2013: see manuscript for description of these parameterizations). b. Relative bias in  $K_{eff}^X$  with respect to  $K_{eff-z}^{CT}$  as a function of the anisotropy parameter  $Q$ . Each point represents a snow sample analysed by CT in this study.

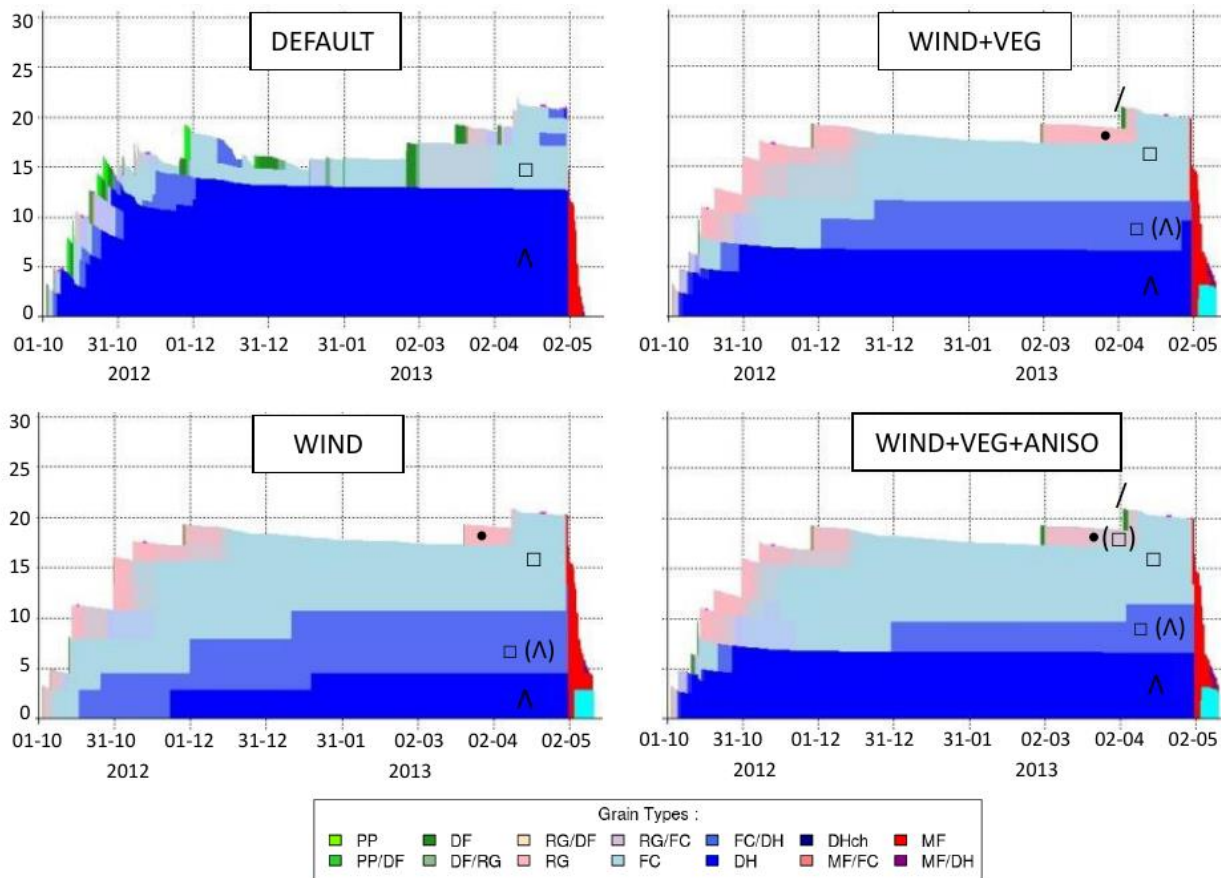

Figure 9: SNOWPACK grain shapes in the 4 simulation setups. In addition to the colour code, the grain shapes from early April to the time of the snow campaign were coded using the symbols from Fierz et al. (2009).

### Observed and simulated profiles on 2013-04-20

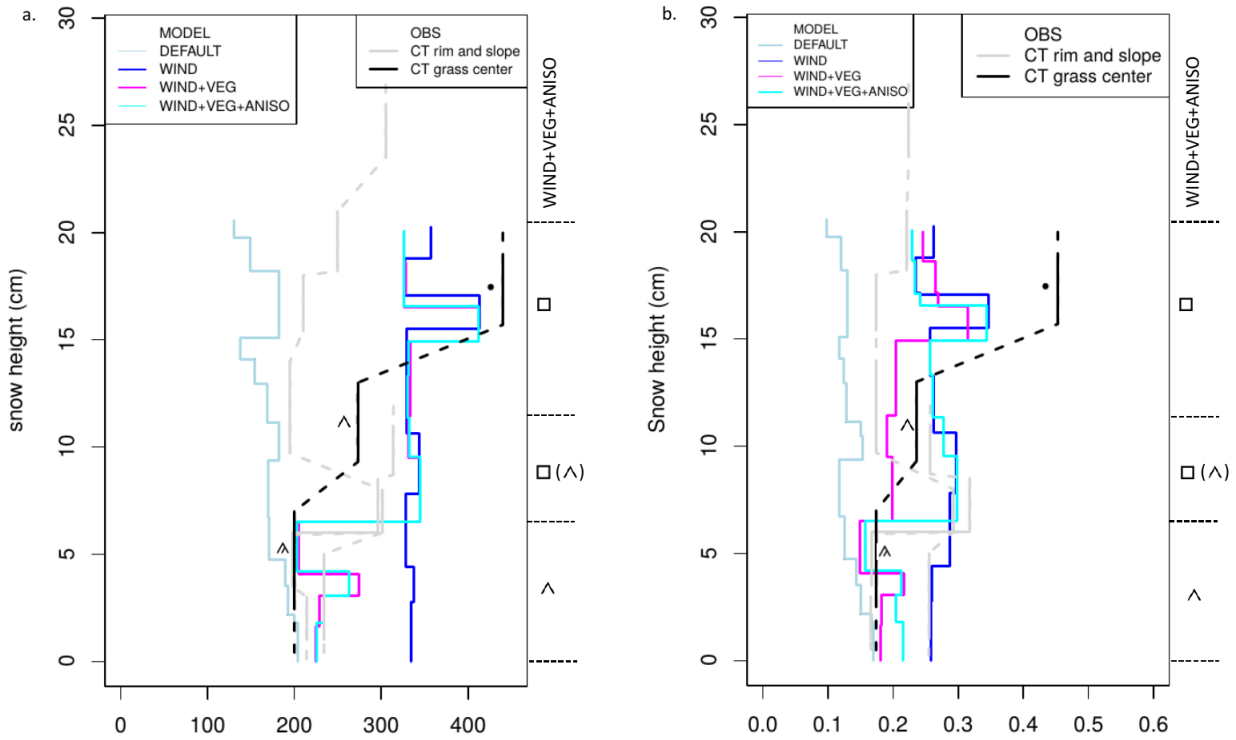

Figure 10: Observed and simulated density and  $K_{eff-z}$  profiles on 20-04-2013. Observations (OBS) are the estimates made using the CT method at the three CT sites with basal vegetation; grain shape is indicated on the plot for the CT grass-center site. Simulations (MODEL) were made with the four SNOWPACK setups; grain shape is indicated at the side for the WIND+VEG+ANISO setup.

5

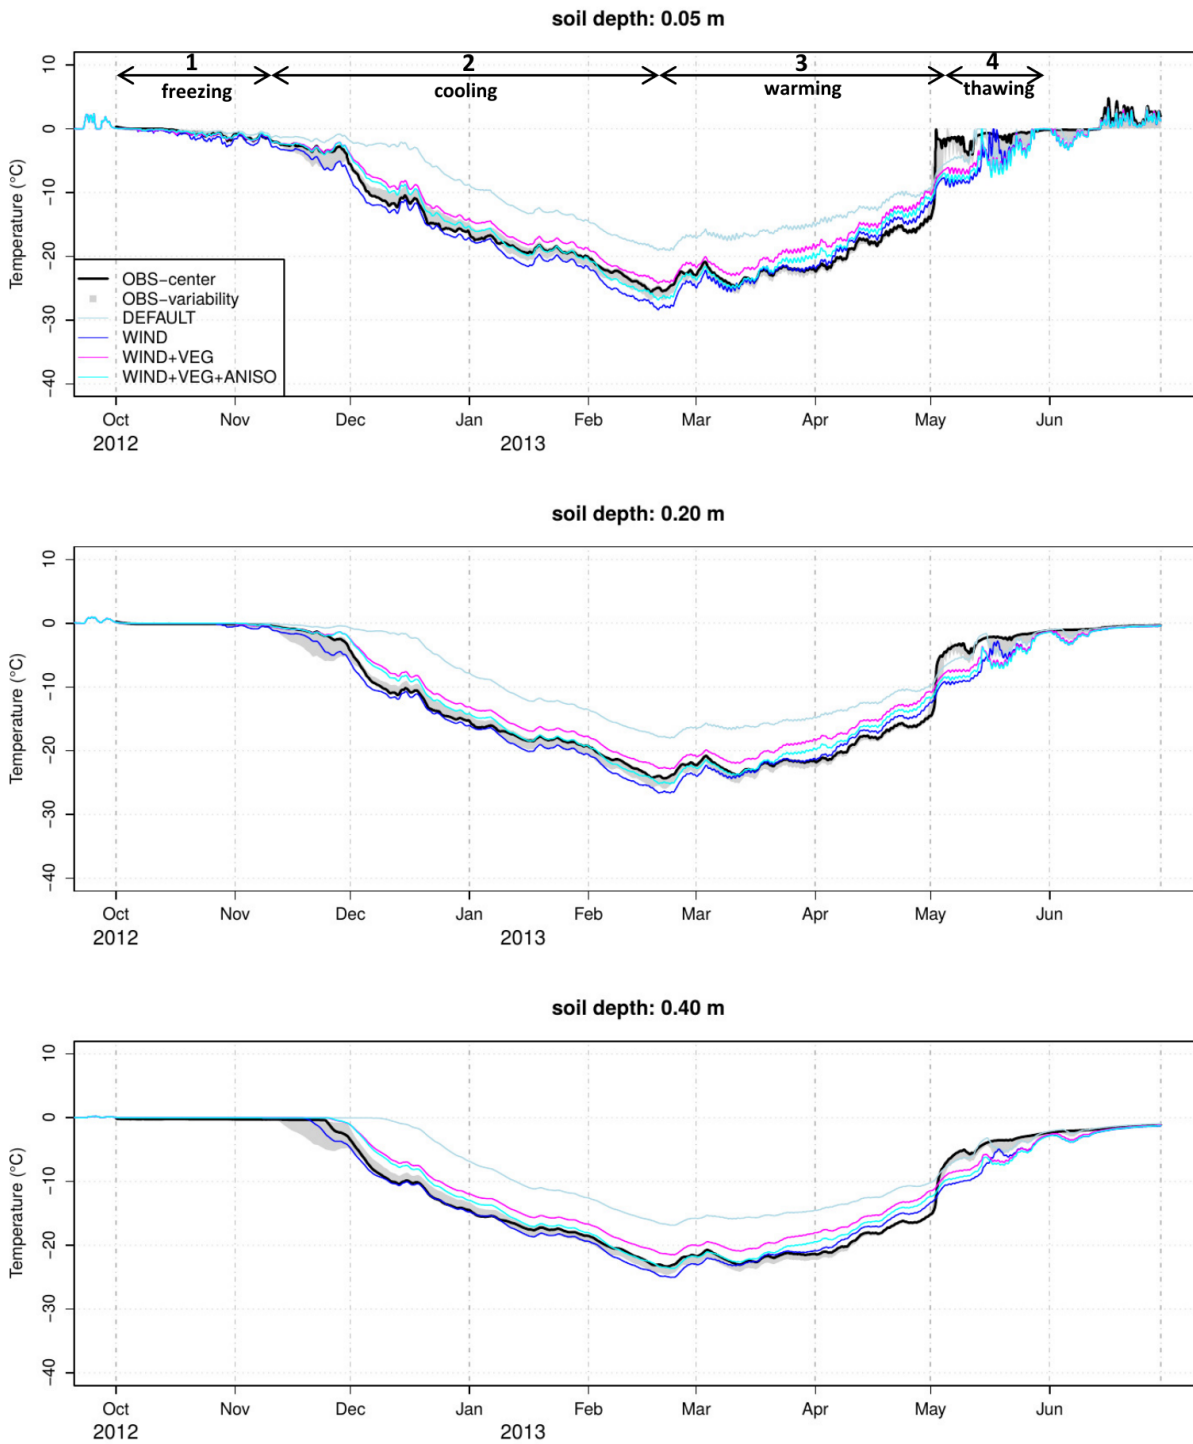

**Figure 11: Simulated vs. observed soil temperatures at depths of 5 cm, 20 cm, and 50 cm in the reference polygon's grass-center. OBS-variability (grey shading) is the envelope of observed soil temperatures from the monitored rim, center, and slope soil sites. The winter phases from Sect. 5.2 have been reported.**

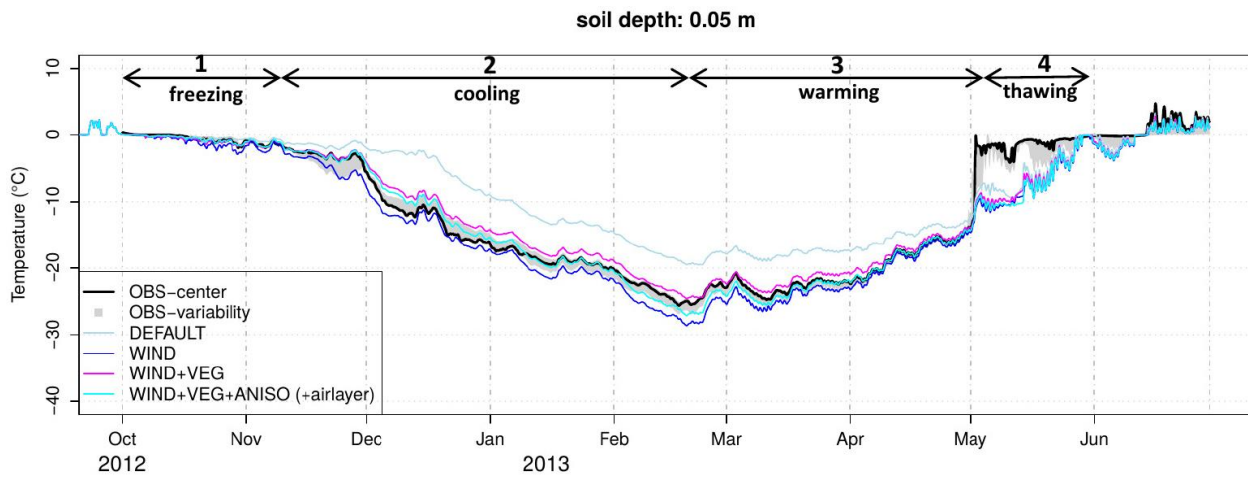

Figure 12: As for Fig. 8 but with radiative transfer in snow switched off and the air-layer scenario added to the WIND+VEG+ANISO option.

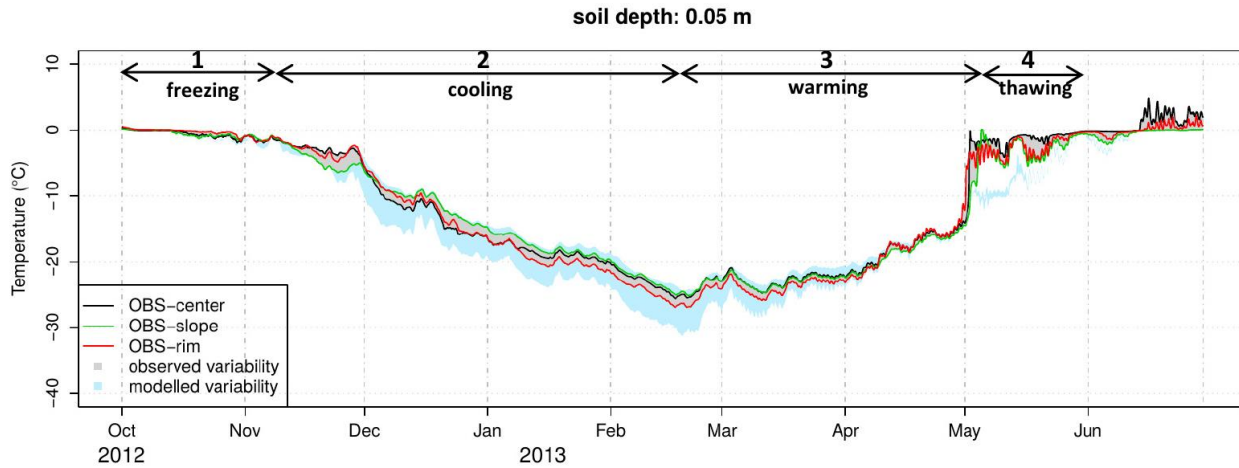

5

Figure 13: Simulated and observed soil temperature variability (in °C) at 5 cm depth. Observed soil temperatures at rim, center and slope locations in the reference polygon are overlain.



**Table 1: Nash-Sutcliff model efficiency criteria (Nash and Sutcliff, 1970) between the soil temperature simulations and measurements at different depths in the grass-center of the reference polygon.**

| Depth<br>setup | 5 cm | 20 cm | 40 cm |
|----------------|------|-------|-------|
| DEFAULT        | 0.72 | 0.70  | 0.66  |
| WIND           | 0.96 | 0.97  | 0.98  |
| WIND+VEG       | 0.95 | 0.95  | 0.94  |
| WIND+VEG+ANISO | 0.96 | 0.97  | 0.97  |

**5 Table 2: End-of-season properties for DH and wind-slabs.**

|                                                  | DH   | Wind-slabs |
|--------------------------------------------------|------|------------|
| Density (kg m <sup>-3</sup> )                    | 225  | 360        |
| $K_{eff-z}$ (W m <sup>-1</sup> K <sup>-1</sup> ) | 0.20 | 0.36       |

## Code availability

The adaptations to SNOWPACK used in this study are not included in the SNOWPACK distribution but the description provided in the manuscript allows the simulations to be reproduced in their entirety.

## Data availability

- Meteorological and snow depth data are available at <https://doi.org/10.1594/PANGAEA.879341>.

## Appendices

### Appendix A: Regression of anisotropy parameter $Q$ to grain size

#### A.1 Regression of $Q$ to optical diameter in data from Löwe et al. (2013)

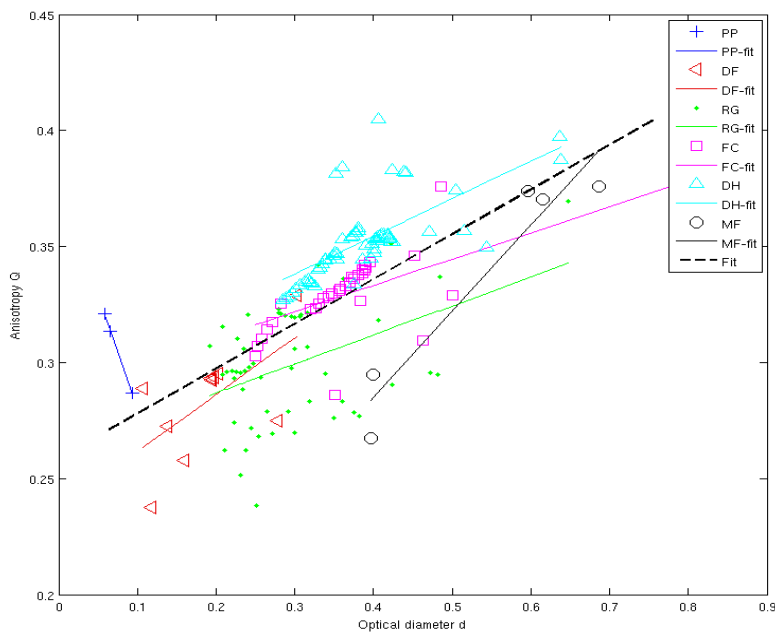

10 **Figure A1:** Regression of anisotropy parameter  $Q$  to optical diameter  $d$  within snow type classes in data from Löwe et al. (2013).

**Table A1: Regression coefficients for Fig. A1. All data within a snow type class were fitted to  $Q^{REG}=a*d + b$ , where  $d$  is given in mm. When several grain types coexist, the dominant type is listed first.**

| Snow type | a [1/mm] | b [-]  | R <sup>2</sup> |
|-----------|----------|--------|----------------|
| PP        | -0.9631  | 0.3775 | 0.9954         |
| DF        | 0.2450   | 0.2372 | 0.3981         |
| RG        | 0.1250   | 0.2619 | 0.1872         |
| FC        | 0.1132   | 0.2880 | 0.4356         |
| DH        | 0.1620   | 0.2895 | 0.4645         |
| MF        | 0.3733   | 0.1354 | 0.9155         |
| All       | 0.1930   | 0.2587 | 0.4330         |

## A.2 Regression of $Q$ to SNOWPACK grain radius, used in the ANISO adaptation

**Q as a function of SNOWPACK grain size**

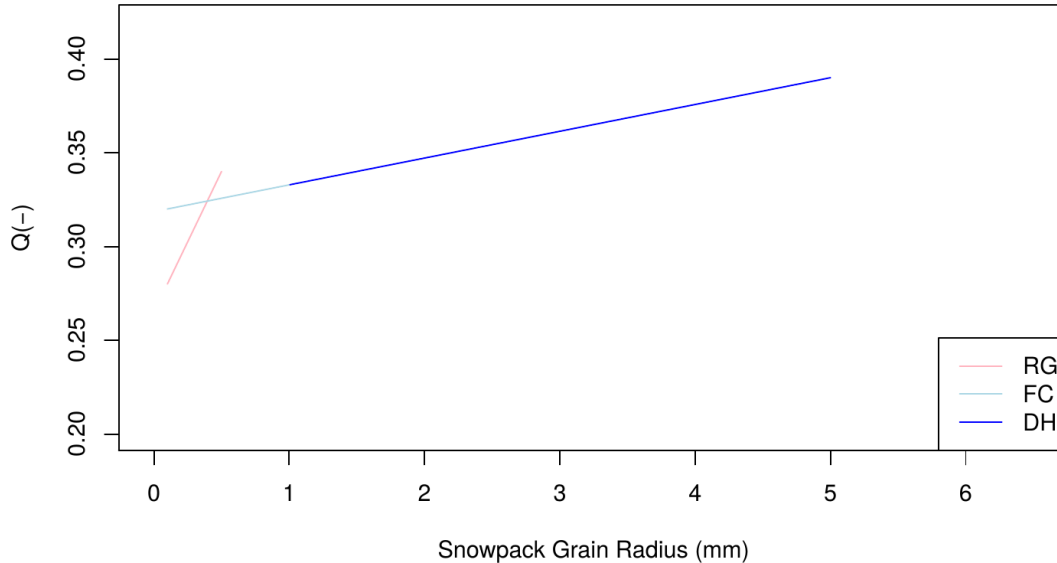

**Figure A2: Evolution of  $Q$  as parameterized in SNOWPACK ANISO adaptation.**

- 5 In the ANISO adaptation,  $Q$  is parameterized as a function ( $Q^{ANISO}$ ) of SNOWPACK grain radius ( $rg$ ) for each of the FC, DH and RG snow type class:

$$Q^{ANISO}(rg) = \frac{Q^{REG}(d_{max}) - Q^{REG}(d_{min})}{rg_{max} - rg_{min}} \cdot (rg - rg_{min}) + Q^{REG}(d_{min}) \quad (A1)$$

where  $rg_{max}$  and  $rg_{min}$  are the maximum and minimum values of  $rg$  possibly achieved in SNOWPACK for the given snow type class (see Table A2), and  $d_{max}$  and  $d_{min}$  the maximum and minimum values of  $d$  obtained in the data from Löwe et al. (2013) in the given snow type class.

Because SNOWPACK features a continuum between FC and DH grain radii, both grain type classes were merged in the ANISO adaptation by using  $Q^{REG}(d_{max})$  from DH and  $Q^{REG}(d_{min})$  from FC in Eq. (A1) (see Fig. A2).

**Table A2: Parameters of the ANISO adaptation; Eq. (A1)**

| Snow type | $rg_{min}$ (mm) | $rg_{max}$ (mm) | $Q^{REG}(d_{min})$ | $Q^{REG}(d_{max})$ |
|-----------|-----------------|-----------------|--------------------|--------------------|
| RG        | 0.1             | 0.5             | 0.28               | 0.34               |
| FC        | 0.1             | 1               | 0.32               |                    |
| DH        | 1               | 5               |                    | 0.39               |
| FC and DH | 0.1             | 5               | 0.32               | 0.39               |

**Appendix B: Construction of snow depth, DH height,  $K_{eff-z}$  and  $R_{th}$  time-series at the transect data points**

A visual estimate of the DH thickness and total snow depth was made at each of the 31 transect points ( $pt$ ), based on the NIR image from date  $t2=2013-04-20$  (estimated accuracy +/- 0.5 cm).

5 The following assumptions were made in the construction of DH thickness and snow depth ( $HS(t)$ ) time-series over the entire snow season consistent with observations made at date  $t2$ :

- The snow depth was assumed to build up in a spatially homogeneous manner until date  $t1=2012-10-31$  (confirmed by time-lapse photographs of the reference polygon). All 31 data points were therefore attributed the same snow depth until that date (i.e. the corrected snow depth ( $HS_{50}(t)$ ) measured by the SR50 sensor). Erosion-deposition processes subsequently lead to different accumulations ( $HS_{pt}$ ) at each point along the transect. Do to the shortage of data, we linearly scaled  $HS_{50}(t)$  that matched the end-of-season snow depth ( $HS_{pt}(t2)$ ) for each point:

$$HS_{pt}(t > t1) = HS_{SR50}(t1) + \frac{HS_{pt}(t2) - HS_{SR50}(t1)}{HS(t2) - HS_{SR50}(t1)} \cdot (HS(t) - HS_{SR50}(t1)) \quad (A2)$$

- We also considered a homogeneous DH build-up until  $t1$ : we used the DH build-up from the WIND+VEG+ANISO simulation for all transect points until  $t1$ . For  $t > t1$ , we considered the DH thickness at each transect point to increase linearly to its end-of-season value. An exception was made when the observed end-of-season DH thickness was less than the modelled DH thickness at  $t1$ : in this case we considered the DH thickness to remain constant after its end-of-season value had been reached in the SNOWPACK simulation.

The constructed snow depth and DH thickness time series are illustrated in Fig. B1.

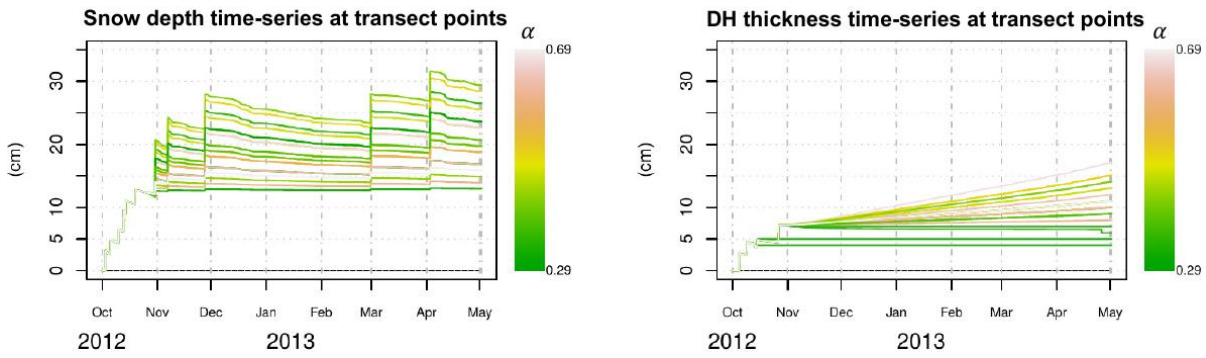

**Figure B1:** Constructed snow depth and DH thickness time-series for each transect point. As in the manuscript,  $\alpha$  is the DH-thickness to total snow depth ratio at time  $t_2$ .

Applying the 2-layer approach to the snow depths and DH thickness time-series using the snow properties described in the text (Sect. 6) leads to the  $K_{eff-z}$  and  $R_{th}$  ensembles illustrated in Fig. B2.

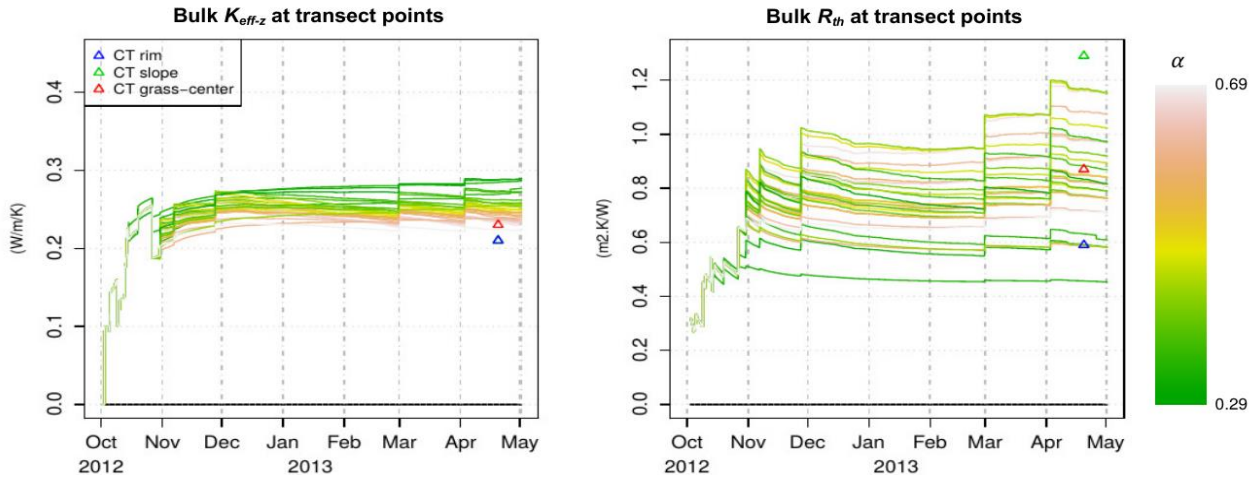

**Figure 14:** Simulated  $K_{eff-z}$  and  $R_{th}$  time-series at the 31 transect data points. Overlain are the bulk properties estimated at the rim, slope and grass-center CT sites.

## Appendix C: Thermal gradient between air and soil (5 cm depth)

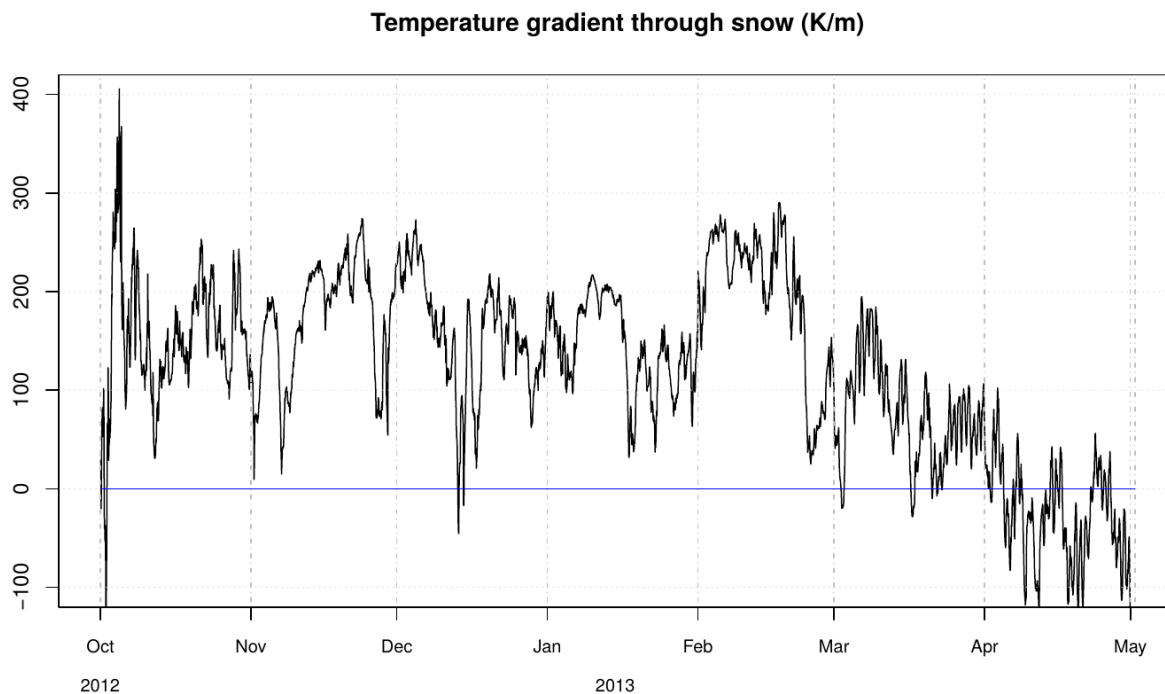

**Figure C1: Temperature gradient between air and soil (5 cm depth) at the grass-center of the reference polygon.**

### Team Composition

- 5 Isabelle Gouttevin (IG), Moritz Langer (ML), Henning Löwe (HL), Julia Boike (JB), Martin Proksch (MP) and Martin Schneebeli (MS).

### Author contribution

- M.S. and M.P. conceived the snow study. M.P. collected the snow data. M.L. and J.B. contributed the soil, permafrost and meteorological measurements. I.G., M.L., and H.L. performed the numerical simulations. All authors contributed to the conception of the study. I.G. prepared the manuscript with contributions from all co-authors.
- 10

### Competing interests

The authors declare that they have no conflict of interest.

## Special issue statement

This article is submitted to the joint special issue “Changing Permafrost in the Arctic and its Global Effects in the 21st Century (PAGE21)” (BG/ESSD/GMD/TC inter-journal SI).

## Acknowledgements

- 5 We thank Mathias Bavay for his constant help and brilliant management of the SNOWPACK core structure and integration of new developments. Our sincere thanks go also to Michael Lehning and Charles Fierz for providing funding, enthusiasm, and insightful comments on development choices. We thank Florent Dominé for his vision of the processes at stake and the critical model limitations, and Jean-Emmanuel Sicart for very valuable comments. The field work for M.P. was supported by the INTERACT-TA project SSTIS.

## 10 References

- Adams, E. E. and Sato, A.: Model for effective thermal conductivity of a dry snow cover composed of uniform ice spheres, *Ann. Glaciol.*, 18(1), 300-304, 1993.
- Avis, C. A., Weaver, A. J. and Meissner, K. J.: Reduction in areal extent of high-latitude wetlands in response to permafrost thaw, *Nat. Geosci.*, 4(7), 444-448, 2011.
- 15 Barrere, M., Domine, F., Decharme, B., Morin, S., Vionnet, V., and Lafaysse, M.: Evaluating the performance of coupled snow-soil models in SURFEXv8 to simulate the permafrost thermal regime at a high Arctic site, *Geosci. Model Dev. Discuss.*, doi:10.5194/gmd-2017-50, 2017
- Bartelt, P., and Lehning, M.: A physical SNOWPACK model for the Swiss avalanche warning: Part I: numerical model, *Cold Reg. Sci. Technol.*, 35(3), 123-145, 2002.
- 20 Boike, J., Hinzman, L. D., Overduin, P. P., Romanovsky, V., Ippisch, O. and Roth, K.: A comparison of snow melt at three circumpolar sites: Spitsbergen, Siberia, Alaska, *Proceedings of the 8th International Conference on Permafrost, Zurich, Switzerland, 21-25 July 2003*, 79-84, 2003.
- Boike, J., Wille, C., and Abnizova, A.: Climatology and summer energy and water balance of polygonal tundra in the Lena River Delta, Siberia, *J. Geophys. Res.-Biogeo*, 113(G3), 2008.
- 25 Boike, J., Kattenstroth, B., Abramova, K., Bornemann, N., Chetverova, A., Fedorova, I., Fröb, K., Grigoriev, M. N., Grüber, M., Kutzbach, L., Langer, M., Minke, M., Muster, S., Piel, K., Pfeiffer, E.-M., Stoof, G., Westermann, S., Wischniewski, K., Wille, C., and Hubberten, H.-W.: Baseline characteristics of climate, permafrost and land cover from a new permafrost observatory in the Lena River Delta, Siberia (1998-2011), *Biogeosciences*, 10(3), 2105-2128, 2013.
- Burke, E. J., Hartley, I. P. and Jones, C. D.: Uncertainties in the global temperature change caused by carbon release from
- 30 permafrost thawing, *Cryosphere* 6, 1063–1076, 2012.



- Brun, E., Six, D., Picard, G., Vionnet, V., Arnaud, L., Bazile, E., Boone, A., Bouchard, A., Genthon, C., Guidard, V., Le Moigne, P., Rabier, F. and Seity, Y.: Snow/atmosphere coupled simulation at Dome C, Antarctica, *J. Glaciol.*, 57(204), 721-736, 2011.
- Brun, E., Vionnet, V., Boone, A., Decharme, B., Peings, Y., Valette, R., Karbou, F. and Morin, S.: Simulation of northern eurasian local snow depth, mass, and density using a detailed snowpack model and meteorological reanalyses. *Journal of Hydrometeorology*, 14(1), 203-219, 2013.
- Calonne, N., Flin, F., Morin, S., Lesaffre, B., du Roscoat, S. R. and Geindreau, C.: Numerical and experimental investigations of the effective thermal conductivity of snow, *Geophys. Res. Lett.*, 38(23), 2011.
- Calonne, N., Flin, F., Geindreau, C., Lesaffre, B., and Rolland du Roscoat, S.: Study of a temperature gradient metamorphism of snow from 3-D images: time evolution of microstructures, physical properties and their associated anisotropy, *Cryosphere*, 8(6), 2255-2274, 2014.
- Coléou, C., Lesaffre, B., Brzoska, J. B., Ludwig, W., and Boller, E.: Three-dimensional snow images by X-ray microtomography, *Ann. Glaciol.*, 32(1), 75-81, 2001.
- Dall'Amico, M., Endrizzi, S., Gruber, S., and Rigon, R.: A robust and energy-conserving model of freezing variably-saturated soil, *Cryosphere*, 5(2), 469, 2011.
- D'Amboise, C. J., Müller, K., Oxarango, L., Morin, S., & Schuler, T. V.: Implementation of a physically based water percolation routine in the Crocus/SURFEX (V7. 3) snowpack model. *Geoscientific Model Development*, 10(9), 3547, 2017.
- Dee, D. P., Uppala, S. M., Simmons, A. J., Berrisford, P., Poli, P., Kobayashi, S., Andrae, U., Balmaseda, M-A., Balsamo, G., Bauer, P., Bechtold, P., Beljaars, A.C.M, van de Berg, L., Bidlot, J., Bormann, N., Delsol, C., Dragani, R., Fuentes, M., Geer, A.J., Haimberger, L., Healy, S.B., Hersbach, H. , Hólm, E.V., Isaksena, L., Kállberg, P., Köhler, M., Matricardi, M. , McNally, A-P., Monge-Sanz, B.M., Morcrette, J-J., Park, B-K., Peubey, C., de Rosnay, P., Tavolato, C., Thépaut , J.N. and Vitart, F.: The ERA-Interim reanalysis: Configuration and performance of the data assimilation system, *Quarterly Journal of the royal meteorological society*, 137(656), 553-597, 2011.
- Derksen, C., Silis, A., Sturm, M., Holmgren, J., Liston, G. E., Huntington, H. and Solie, D.: Northwest Territories and Nunavut snow characteristics from a subarctic traverse: Implications for passive microwave remote sensing, *Journal of Hydrometeorology*, 10(2), 448-463, 2009.
- Domine, F., Barrere, M., Sarrazin, D., Morin, S., and Arnaud, L.: Automatic monitoring of the effective thermal conductivity of snow in a low-Arctic shrub tundra, *Cryosphere*, 9(3), 1265-1276, 2015.
- Domine, F., Barrere, M., and Morin, S.: The growth of shrubs on high Arctic tundra at Bylot Island: impact on snow physical properties and permafrost thermal regime, *Biogeosciences*, 13(23), 6471, 2016a.
- Domine, F., Barrere, M., and Sarrazin, D.: Seasonal evolution of the effective thermal conductivity of the snow and the soil in high Arctic herb tundra at Bylot Island, Canada, *Cryosphere*, 10(6), 2573, 2016b.
- Flanner, M. G., and Zender, C. S.: Snowpack radiative heating: Influence on Tibetan Plateau climate, *Geophys. Res. Lett.*, 32(6), 2005.

- Fierz, C., Armstrong, R.L., Durand, Y., Etchevers, P., Greene, E., McClung, D.M., Nishimura, K., Satyawali, P.K., and Sokratov, S.A.: The international classification for seasonal snow on the ground, Tech. Doc. Hydrol., 83, UNESCO/IHP, Paris, France, 2009.
- Garboczi, E. J.: Finite Element and Finite Difference Programs for Computing the Linear Electric and Elastic Properties of Digital Images of Random Materials, NISTIR, 6269, 1998.
- 5 Gisnås, K., Westermann, S., Schuler, T. V., Melvold, K., and Etzelmüller, B.: Small-scale variation of snow in a regional permafrost model, *Cryosphere*, 10(3), 1201-1215, 2016.
- Gouttevin, I., Menegoz, M., Dominé, F., Krinner, G., Koven, C., Ciais, P., Tarnocai, C., and Boike, J.: How the insulating properties of snow affect soil carbon distribution in the continental pan-Arctic area, *J. Geophys. Res.-Biogeo*, 117(G2), 10 2012.
- Groot Zwaaftink, C. D., Cagnati, A., Crepez, A., Fierz, C., Macelloni, G., Valt, M., and Lehning, M.: Event-driven deposition of snow on the Antarctic Plateau: analyzing field measurements with SNOWPACK, *Cryosphere*, 7(1), 333-347, 2013.
- Grosse, G., Goetz, S., McGuire, A. D., Romanovsky, V. E., and Schuur, E. A., Changing permafrost in a warming world and 15 feedbacks to the Earth system, *Environmental Research Letters*, 11(4), 040201, 2016.
- Heggli, M., Frei, E., and Schneebeli, M.: Snow replica method for three-dimensional X-ray microtomographic imaging, *J. Glaciol.*, 55(192), 631-639, 2009.
- Hobbie, S. E., Schimel, J. P., Trumbore, S. E., and Randerson, J. R.: Controls over carbon storage and turnover in high-latitude soils, *Global Change Biol.*, 6, 196–210, doi:10.1046/j.1365-2486.2000.06021.x, 2000.
- 20 Hutchison, B. A.: Snow accumulation and disappearance influenced by big sagebrush, Research Note RM 46, Rocky Mountain Forest and Range Experiment Station, Forest Service, US Department of Agriculture, Fort Collins, USA, 1965.
- Jafarov, E. E., Nicolsky, D. J., Romanovsky, V. E., Walsh, J. E., Panda, S. K., and Serreze, M. C.: The effect of snow: How to better model ground surface temperatures, *Cold Reg. Sci.Technol.*, 102, 63-77, 2014.
- Koven, C., Friedlingstein, P., Ciais, P., Khvorostyanov, D., Krinner, G., and Tarnocai, C.: On the formation of high-latitude 25 soil carbon stocks: Effects of cryoturbation and insulation by organic matter in a land surface model, *Geophys. Res. Lett.*, 36(21), 2009.
- Kumar, J., Collier, N., Bisht, G., Mills, R. T., Thornton, P. E., Iversen, C. M., & Romanovsky, V. (2016). Modeling the spatiotemporal variability in subsurface thermal regimes across a low-relief polygonal tundra landscape. *The Cryosphere*, 10(5), 2241.
- 30 Langer, M., Westermann, S., Heikenfeld, M., Dorn, W., and Boike, J.: Satellite-based modeling of permafrost temperatures in a tundra lowland landscape, *Remote Sens. Environ.*, 135, 12-24, 2013.
- Langer, M., Westermann, S., Boike, J., Kirillin, G., Grosse, G., Peng, S. and Krinner, G.: Rapid degradation of permafrost underneath waterbodies in tundra landscapes: Toward a representation of thermokarst in land surface models, *J. Geophys. Res.-Earth*, 121(12), 2446-2470, 2016.

- Lawrence, D. M., and Slater, A. G.: The contribution of snow condition trends to future ground climate, *Clim. Dynam.*, 34(7-8), 969-981, 2010.
- Lawrence, D. M., and Swenson, S. C.: Permafrost response to increasing Arctic shrub abundance depends on the relative influence of shrubs on local soil cooling versus large-scale climate warming, *Environ. Res. Lett.*, 6(4), 045504, 2011.
- 5 Leinss, S., Löwe, H., Proksch, M., Lemmetyinen, J., Wiesmann, A., and Hajnsek, I.: Anisotropy of seasonal snow measured by polarimetric phase differences in radar time series, *Cryosphere*, 10, 1771-1797, <https://doi.org/10.5194/tc-10-1771-2016>, 2016.
- Lehning, M., and Fierz, C.: Assessment of snow transport in avalanche terrain. *Cold Reg. Sci.Technol.*, 51(2), 240-252, 2008.
- 10 Lehning, M., Bartelt, P., Brown, B., and Fierz, C.: A physical SNOWPACK model for the Swiss avalanche warning: Part III: Meteorological forcing, thin layer formation and evaluation, *Cold Reg. Sci.Technol.*, 35(3), 169-184, 2002a.
- Lehning, M., Bartelt, P., Brown, B., Fierz, C., and Satyawali, P.: A physical SNOWPACK model for the Swiss avalanche warning: Part II. Snow microstructure, *Cold Reg. Sci.Technol.*, 35(3), 147-167, 2002b.
- Libois, Q.: Evolution des propriétés physiques de neige de surface sur le plateau Antarctique. Observations et modélisation du transfert radiatif et du métamorphisme, PhD thesis, Université Grenoble Alpes, France, 273 pp., 2014.
- 15 Libois, Q., Picard, G., France, J. L., Arnaud, L., Dumont, M., Carmagnola, C. M., and King, M. D.: Influence of grain shape on light penetration in snow, *Cryosphere*, 7(6), 1803, 2013.
- Liston, G.E. and Elder, K.: A distributed snow-evolution modeling system (SnowModel). *J. Hydrometeorol.* 7, 1259–1276. <http://dx.doi.org/10.1175/JHM548>, 2006..
- 20 Liljedahl, A. K., Boike, J., Daanen, R. P., Fedorov, A. N., Frost, G. V., Grosse, G., Hinzman, L. D., Iijma, Y., Jorgenson, J. C., Matveyeva, N., Necsoiu, M., Reynolds, M. K., Romanovsky, V. E., Schulla, J., Tape, K. D., Walker, D. A., Wilson, C. J., Yabuki, H. and Zona, D.: Pan-Arctic ice-wedge degradation in warming permafrost and its influence on tundra hydrology. *Nature Geoscience*, 9(4), 312-318, 2016.
- Löwe, H., Riche, F., and Schneebeli, M.: A general treatment of snow microstructure exemplified by an improved relation for thermal conductivity, *Cryosphere*, 7(5), 1473-1480, 2013.
- 25 Marsh, P., and Woo, M. K.: Wetting front advance and freezing of meltwater within a snow cover: 1. Observations in the Canadian Arctic, *Water Resour. Res.*, 20(12), 1853-1864, 1984a.
- Marsh, P., and Woo, M. K.: Wetting front advance and freezing of meltwater within a snow cover: 2. A simulation model, *Water Resour. Res.*, 20(12), 1865-1874, 1984b.
- 30 Montpetit, B., Royer, A., Roy, A., Langlois, A. and Derksen, C.: Snow microwave emission modeling of ice lenses within a snowpack using the microwave emission model for layered snowpacks. *IEEE Transactions on Geoscience and Remote Sensing*, 51(9), 4705-4717, 2013.
- Muster, S., Langer, M., Heim, B., Westermann, S., and Boike, J.: Subpixel heterogeneity of ice-wedge polygonal tundra: a multi-scale analysis of land cover and evapotranspiration in the Lena River Delta, Siberia, *Tellus B*, 64, 2012.

- Muster, S., Heim, B., Abnizova, A., and Boike, J.: Water body distributions across scales: A remote sensing based comparison of three arctic tundra wetlands, *Remote Sensing*, 5(4), 1498-1523, 2013.
- Nash, J. E., and Sutcliffe, J. V.: River flow forecasting through conceptual models part I - A discussion of principles, *J. Hydrol.*, 10(3), 282-290, 1970.
- 5 O'Neill, A. D. J., and Gray, D. M.: Solar radiation penetration through snow, in: *The Role of Snow and Ice in Hydrology*, Proceedings of the Banff Symposium, Banff, Canada, September 1972, 227-240, 1972.
- Ouellet, F., Langlois, A., Blukacz-Richards, E. A., Johnson, C. A., Royer, A., Neave, E. and Larter, N. C.: Spatialization of the SNOWPACK snow model for the Canadian Arctic to assess Peary caribou winter grazing conditions. *Physical Geography*, 38(2), 143-158, 2017.
- 10 Pinzer, B. R., Schneebeli, M., and Kaempfer, T. U.: Vapor flux and recrystallization during dry snow metamorphism under a steady temperature gradient as observed by time-lapse microtomography, *Cryosphere*, 6(5), 1141, 2012.
- Putkonen, J., and Roe, G.: Rain-on-snow events impact soil temperatures and affect ungulate survival. *Geophysical Research Letters*, 30(4), 2003.
- Riche, F., and Schneebeli, M.: Thermal conductivity of snow measured by three independent methods and anisotropy  
15 considerations, *Cryosphere*, 7(1), 217, 2013.
- Rutter, N., Sandells, M., Derksen, C., Toose, P., Royer, A., Montpetit, B., Langlois, A., Lemmetyinen, J. and Pulliainen, J.: Snow stratigraphic heterogeneity within ground-based passive microwave radiometer footprints: Implications for emission modelling, *J. Geophys. Res.-Earth*, 119(3), 550-565, 2014.
- Santford H.S.: Snow interactions in interior Alaska, in: *Modeling of Snow Cover Runoff*, Colbeck S. and Ray M. (eds), US  
20 Army CRREL, Hanover, New-Hampshire, 311- 318, 1978.
- Schneebeli, M., and Sokratov, S. A.: Tomography of temperature gradient metamorphism of snow and associated changes in heat conductivity, *Hydrol. Process.*, 18(18), 3655-3665, 2004.
- Schneebeli, M., Coléou, C., Touvier, F., and Lesaffre, B.: Measurement of density and wetness in snow using time-domain reflectometry, *Ann. Glaciol.*, 26, 69-72, 1998.
- 25 Schneider, C. A., Rasband, W. S., and Eliceiri, K. W.: NIH Image to ImageJ: 25 years of image analysis, *Nature methods*, 9(7), 671-675, 2012
- Schuur, E. A. G., McGuire, A. D., Schädel, C., Grosse, G., Harden, J. W., Hayes, D. J., Hugelius, G., Koven, C. D., Kuhry, P., Lawrence, D. M., Natali, S. M., Olefeldt, D., Romanovsky, V. E., Schaefer, K., Turetsky, M. R., Treat, C. C., and Vonk, J. E.: Climate change and the permafrost carbon feedback, *Nature*, 520(7546), 171-179, 2015.
- 30 Schneider, C. A., Rasband, W. S., and Eliceiri, K. W.: NIH Image to ImageJ: 25 years of image analysis, *Nature methods*, 9(7), 671-675, 2012.
- Sturm, M., and Benson, C. S.: Vapor transport, grain growth and depth-hoar development in the subarctic snow, *J. Glaciol.*, 43(143), 42-59, 1997.

- Sturm, M., and Holmgren, J.: Effects of microtopography on texture, temperature and heat flow in Arctic and sub-Arctic snow. *Annals of glaciology*, 19, 63-68, 1994.
- Sturm, M., and Johnson, J. B.: Thermal conductivity measurements of depth hoar, *J. Geophys. Res.-Sol. EA*, 97(B2), 2129-2139, 1992.
- 5 Sturm, M., Holmgren, J., and Liston, G. E.: A seasonal snow cover classification system for local to global applications, *J. Climate*, 8(5), 1261-1283, 1995.
- Sturm, M., Holmgren, J., König, M., and Morris, K.: The thermal conductivity of seasonal snow, *J. Glaciol.*, 43(143), 26-41, 1997.
- Srivastava, P. K., Chandel, C., Mahajan, P., and Pankaj, P.: Prediction of anisotropic elastic properties of snow from its  
10 microstructure, *Cold Reg. Sci. Technol.*, 125, 85-100, 2016.
- Vionnet, V., Brun, E., Morin, S., Boone, A., Faroux, S., Le Moigne, P., Martin, E., and Willemet, J. M.: The detailed snowpack scheme Crocus and its implementation in SURFEX v7. 2, *Geosci. Model Dev.*, 5, 773–791, 2012.
- Wainwright, H. M., Liljedahl, A. K., Dafflon, B., Ulrich, C., Peterson, J. E., Gusmeroli, A., and Hubbard, S. S.: Mapping snow depth within a tundra ecosystem using multiscale observations and Bayesian methods, *The Cryosphere*, 11, 857-875,  
15 <https://doi.org/10.5194/tc-11-857-2017>, 2017.
- Waite, W. F., Gilbert, L. Y., Winters, W. J., and Mason, D. H.: Estimating thermal diffusivity and specific heat from needle probe thermal conductivity data, *Rev. Sci. Instrum.*, 77(4), 044904, 2006.
- Wang, T., Ottlé, C., Boone, A., Ciais, P., Brun, E., Morin, S., Krinner, G., Piao, S. and Peng, S.: Evaluation of an improved intermediate complexity snow scheme in the ORCHIDEE land surface model, *J. Geophys. Res.-Atmos*, 118(12), 6064-6079,  
20 2013.
- Westermann, S., Langer, M., Boike, J., Heikenfeld, M., Peter, M., Eitzelmüller, B., and Krinner, G.: Simulating the thermal regime and thaw processes of ice-rich permafrost ground with the land-surface model CryoGrid 3, *Geosci. Model Dev. Disc.*, 9, 523-546, 2016.
- Westermann, S.: Sensitivity of permafrost. PhD thesis, Ruperto-Carola University of Heidelberg, Germany, 192 pp., 2010.
- 25 Woo, M. K.: Upward flux of vapor from frozen materials in the High Arctic, *Cold Reg. Sci. Technol.*, 5(3), 269-274, 1982.
- Yen, Y. C.: Review of thermal properties of snow, ice and sea ice, CRREL Report 81-10, CRREL, Hannover; New-Hampshire, 1981.
- Wever, N., Schmid, L., Heilig, A., Eisen, O., Fierz, C., & Lehning, M. (2015). Verification of the multi-layer SNOWPACK model with different water transport schemes. *The Cryosphere*, 9(6), 2271-2293.
- 30 Zhang, T.: Influence of the seasonal snow cover on the ground thermal regime: An overview, *Rev. Geophys.*, 43(4), 2005.
- Zhang, T., Osterkamp, T. E., and Stamnes, K.: Influence of the depth hoar layer of the seasonal snow cover on the ground thermal regime, *Wat. Resour. Res.*, 32(7), 2075-2086, 1996.
